1 **Title:** *gbpA* and *chiA* genes are not uniformly distributed amongst diverse *Vibrio cholerae*

2

3 **Authors:** Thea G. Fennell<sup>1,2#</sup>, Grace A. Blackwell<sup>1,3</sup>, Nicholas R. Thomson<sup>1,4</sup> & Matthew J.

4 Dorman<sup>1,2‡</sup>

5

6 1. Wellcome Sanger Institute, Wellcome Genome Campus, Hinxton, CB10 1SA, UK

7 2. Churchill College, Storey's Way, Cambridge, CB3 0DS, UK

8 3. EMBL-EBI, Wellcome Genome Campus, Hinxton, CB10 1SD, UK

9 4. London School of Hygiene and Tropical Medicine, Keppel St, Bloomsbury, London,

10 WC1E 7HT, UK

11

12 ‡ Correspondence to M.J.D.: [md25@sanger.ac.uk](mailto:md25@sanger.ac.uk); [mjd211@cam.ac.uk](mailto:mjd211@cam.ac.uk)

13

14 # Current address: Sainsbury Laboratory, University of Cambridge, Bateman Street,

15 Cambridge, CB2 1LR, UK

16

17 **ORCIDs:**

18 T.G.F.: [0000-0002-3230-1452](https://orcid.org/0000-0002-3230-1452)

19 G.A.B.: [0000-0003-3921-3516](https://orcid.org/0000-0003-3921-3516)

20 N.R.T.: [0000-0002-4432-8505](https://orcid.org/0000-0002-4432-8505)

21 M.J.D.: [0000-0001-7064-6163](https://orcid.org/0000-0001-7064-6163)

22

23 **Keywords:** *Vibrio cholerae*, chitin, chitinase, GbpA, ChiA, cholera

24

25 **Abbreviations:** 4-MU = 4-methylumbelliferyl. ABC transporter = ATP-binding cassette  
26 transporters. CmR = chloramphenicol resistant. DMSO = dimethyl sulfoxide. dNTP =  
27 deoxyribonucleoside triphosphate. GlcNAc = *N*-acetyl- $\beta$ -D-glucosamine. MSHA = mannose-  
28 sensitive haemagglutinin. SNV = single nucleotide variant. StrR = streptomycin resistant.  
29 PTS transporter = phosphotransferase transporter.  
30

31 **Abstract**

32 Members of the bacterial genus *Vibrio* utilise chitin both as a metabolic substrate and a signal  
33 to activate natural competence. *Vibrio cholerae* is a bacterial enteric pathogen, sub-lineages  
34 of which can cause pandemic cholera. However, the chitin metabolic pathway in *V. cholerae*  
35 has been dissected using only a limited number of laboratory strains of this species. Here, we  
36 survey the complement of key chitin metabolism genes amongst 195 diverse *V. cholerae*. We  
37 show that the gene encoding GbpA, known to be an important colonisation and virulence  
38 factor in pandemic isolates, is not ubiquitous amongst *V. cholerae*. We also identify a  
39 putatively novel chitinase, and present experimental evidence in support of its functionality.  
40 Our data indicate that the chitin metabolic pathway within the *V. cholerae* species is more  
41 complex than previously thought, and emphasise the importance of considering genes and  
42 functions in the context of a species in its entirety, rather than simply relying on traditional  
43 reference strains.

44

45 **Impact statement**

46 It is thought that the ability to metabolise chitin is ubiquitous amongst *Vibrio* spp., and that  
47 this enables these species to survive in aqueous and estuarine environmental contexts.  
48 Although chitin metabolism pathways have been detailed in several members of this genus,  
49 little is known about how these processes vary within a single *Vibrio* species. Here, we  
50 present the distribution of genes encoding key chitinase and chitin-binding proteins across  
51 diverse *Vibrio cholerae*, and show that our canonical understanding of this pathway in this  
52 species is challenged when isolates from non-pandemic *V. cholerae* lineages are considered  
53 alongside those linked to pandemics. Furthermore, we show that genes previously thought to  
54 be species core genes are not in fact ubiquitous, and we identify novel components of the

55 chitin metabolic cascade in this species, and present functional validation for these  
56 observations.

57

## 58 **Data summary**

59 The authors confirm that all supporting data, code, and protocols have been provided within  
60 the article or through supplementary data files.

61

62 1. No whole-genome sequencing data were generated in this study. Accession numbers for  
63 the publicly-available sequences used for these analyses are listed in Supplementary  
64 Table 1, Table 2, and the Methods.

65

66 2. All other data which underpin the figures in this manuscript, including pangenome data  
67 matrices, modified and unmodified sequence alignments and phylogenetic trees, original  
68 images of gels and immunoblots, raw fluorescence data, amplicon sequencing reads, and  
69 the R code used to generate Figure 7, are available in Figshare:  
70 <https://dx.doi.org/10.6084/m9.figshare.13169189>

71

72 (Note for peer-review: Figshare DOI is inactive but will be activated upon publication,  
73 please use temporary URL <https://figshare.com/s/7795a2d80c13f694f8fa> for review).

74

75

## 76 **Introduction**

77 The *Vibrio* genus of marine  $\gamma$ -proteobacteria contains a number of virulent human pathogens,  
78 of significant public health concern [1]. Most notorious of these pathogens is the *Vibrio*  
79 *cholerae* species, members of which are the aetiological agent of cholera in humans [2, 3].  
80 Two biochemically-defined and distinct *V. cholerae* biotypes are associated with cholera  
81 pandemics. Classical biotype *V. cholerae* are believed to have caused the first six pandemics  
82 [2–4], whilst the current seventh pandemic (1961-present) is attributed to El Tor biotype *V.*  
83 *cholerae* [5, 6]. Genomic evidence has shown that classical *V. cholerae* form a discrete  
84 phylogenetic lineage from the lineage causing the seventh pandemic, dubbed the seventh  
85 pandemic El Tor lineage (7PET) [7–12]. It is to these two pandemic lineages that commonly-  
86 used El Tor and classical biotype laboratory strains belong. Although cholera is estimated to  
87 cause 100,000 deaths annually worldwide [13], other *Vibrio* species can also cause enteric  
88 and extraintestinal disease in humans. For example, *Vibrio vulnificus* can cause septicaemia  
89 and systemic infection in humans [14], and *Vibrio parahaemolyticus* can cause  
90 gastrointestinal infection, septicaemia, and wound infections [1, 15]. Other Vibrios may be  
91 pathogenic to livestock and other animals, such as *Vibrio nigripulchritudino* which is a  
92 pathogen of farmed shrimp [16, 17], and *Vibrio anguillarum*, which causes vibriosis in  
93 multiple species of fish [18].

94

95 In spite of differences in the types of disease which *Vibrio* species may cause, there are  
96 several commonalities amongst members of this genus. For example, it has been suggested  
97 that the ability to grow on chitin is a ubiquitous phenotype amongst the *Vibrionaceae* [19],  
98 and therefore that all *Vibrio* species are capable of metabolising chitin, a highly-abundant  
99 polymer of *N*-acetyl- $\beta$ -D-glucosamine (GlcNAc) [20]. This is directly relevant to the  
100 environmental lifestyles of Vibrios – for example, *V. vulnificus* colonises and grows on the

101 surface of chitinous animals such as shellfish [21]. *V. parahaemolyticus* secretes a  
102 chitinase and can adsorb onto particulate chitin and copepods [22]. Similarly, *V. cholerae* can  
103 metabolise chitin [23], has chitinase activity and can adsorb on chitinous substrates [24], and  
104 can colonise chitinous surfaces such as those of copepods [25]. Chitin metabolism is linked to  
105 other aspects of *Vibrio* biology, including the regulation of natural competence [26–28], and  
106 to the survival of *V. cholerae* in the context of the intestine during an infection [29].

107

108 The pathways by which chitin is degraded and utilised by *V. cholerae* have been described in  
109 detail [30], as it has been in other members of the genus (e.g., [31–38]). Although a  
110 comprehensive review of the chitin utilisation pathway is beyond the scope of this  
111 manuscript, it is important to appreciate the complexity of this pathway. Chitin degradation,  
112 import, and metabolism in *V. cholerae* involves at least 27 proteins, 24 encoded by genes on  
113 chromosome 1, and three by genes on the smaller chromosome 2 [19]. Here, focus will be  
114 directed to the initial stages of chitin metabolism – adhesion to a chitinous substrate, and  
115 expression of extracellular degradative chitinase enzymes.

116

117 The first step in chitin metabolism is the attachment of *V. cholerae* to chitinous surfaces  
118 through interactions with *N*-acetyl- $\beta$ -D-glucosamine (GlcNAc). This is mediated both by the  
119 mannose-sensitive haemagglutinin (MSHA) pilus and the chitin adhesin GbpA (encoded by  
120 *VCA\_0811*, accession # AAF96709.1) [23, 39]. Although GbpA was initially identified as a  
121 putative chitinase enzyme [23], it was shown to be an adhesin induced by GlcNAc which  
122 enabled *V. cholerae* to attach to chitinous substrates [23]. Subsequently, it was found that as  
123 well as mediating attachment of *V. cholerae* to chitin, GbpA is also required for the  
124 successful colonisation of the intestine [39]. This is thought to occur through interactions  
125 with mucin - GbpA interacts with mucin in the intestine, and *gbpA* transcription increases

126 upon exposure of *V. cholerae* to mucin [40]. The crystal structure and domain architecture of  
127 GbpA have been determined [41], and the fourth domain of GbpA is structurally similar to  
128 the chitin-binding domain of known chitinases [41]. Evidence also suggests that GbpA has  
129 lytic polysaccharide monooxygenase activity [42], and that GbpA activity is higher at low  
130 population densities due to the activity of quorum-sensing-regulated proteases [43].

131

132 Once *V. cholerae* adheres to a chitinous surface, extracellular endochitinase enzymes are  
133 required for the bacterium to hydrolyse complex chitin polymers into oligosaccharides which  
134 can be imported into the cell for further metabolism [34]. As many as seven putative  
135 endochitinases have been identified in *V. cholerae* [19, 44, 45], two of which, ChiA-1  
136 (encoded by *VC\_I952*, accession # AAF95100.1) and ChiA-2 (encoded by *VCA\_0027*,  
137 accession # AAF95941.1), are the principal chitinases required for *V. cholerae* chitin  
138 catabolism [23, 30, 44, 46]. ChiA-1 was first shown to be an extracellular chitinase in 1998  
139 [47]; subsequently, ChiA-2 was shown to be important for intestinal colonisation and for  
140 metabolising mucin in the intestine by *V. cholerae* strain N16961 (N16961) [29]. ChiA-2 is  
141 also the most highly-expressed chitinase in El Tor biotype *V. cholerae* strain E7946 [44].  
142 Both ChiA-1 and ChiA-2 are essential for *V. cholerae* to grow in media supplemented with  
143 colloidal chitin [23]. Once chitin oligomers have been digested by extracellular chitinases, the  
144 resultant oligosaccharides are thought to enter the bacterial periplasm *via* the chitoporin ChiP  
145 (encoded by *VC\_0972*, accession # AAF94134.1) and by other as-yet-uncharacterised porins  
146 [23, 35, 48], and subsequently transported to the cytoplasm *via* PTS and ABC-type  
147 transporters [19, 35] (Figure 1).

148

149 Previous work used the genomes of 20 diverse *Vibrionaceae* (including seven *V. cholerae*) to  
150 determine the presence and absence of genes involved in metabolising chitin across this

151 family of bacteria [19]. However, it is important to note that the chitin degradation pathway  
152 of *V. cholerae* has been described using reference strains of the species (particularly in  
153 N16961 [23]), and although data exist on how the chitin catabolism pathway varies amongst  
154 members of the *Vibrio* genus [19], less is known about how this pathway varies within a  
155 single species. This is particularly relevant because emerging evidence suggests that non-  
156 7PET lineages of the *V. cholerae* species cause different patterns of disease, even if they  
157 harbour some or all of the canonical pathogenicity determinants associated with cholera cases  
158 [8]. However, since the chitin metabolic pathway has principally been studied in N16961, a  
159 7PET strain, we know little about the extent to which it varies amongst non-pandemic  
160 members of the *V. cholerae* species.

161

162 In this study, we focused specifically on genes that encode components of the initial steps of  
163 the chitin degradation pathway across the *V. cholerae* species. We focused on these because  
164 the functions of many of these genes have been characterised experimentally, and we sought  
165 to determine how well the observations in the literature reflect the true distribution of these  
166 genes, and their functions, across a diverse species. We generated a pangenome from 195  
167 annotated *V. cholerae* genome sequences, which were chosen to obtain as balanced and  
168 unbiased a view of *V. cholerae* as possible (i.e., without focusing solely on epidemic and  
169 pandemic lineages). We find that the distribution of these genes is not uniform within *V.*  
170 *cholerae*, and we identify variation amongst the chitinases encoded by diverse *V. cholerae*.  
171 We also identify a putatively novel chitinase gene, and present experimental evidence in  
172 support of its functional classification.



173 **Methods**

174 **Strains, plasmids and oligonucleotides**

175 Strains, plasmids, and oligonucleotide primers (Sigma-Aldrich) used for experimental work  
176 in this study are listed in Table 1. Bacteria were cultured routinely on LB media  
177 supplemented with chloramphenicol (10 µg/ml; LB-Cm) where appropriate.

178

179 **Genome sequences and accession numbers**

180 The 198 genome sequences used to calculate the pangenome described in this manuscript are  
181 listed in Supplementary Table 1. Accession numbers for additional chromosome sequences to  
182 which the text refers are as follows: *V. harveyi* chromosome 2 (accession # CP009468.1); *V.*  
183 *parahaemolyticus* chromosome 2 (accession # BA000032.2). Accession numbers for the  
184 chitinase protein sequences referred to in [19] and used for BLASTp comparisons are listed  
185 in Table 2.

186

187 **Genome assemblies**

188 *V. cholerae* genome sequences were assembled from short-read data using SPAdes v3.8.2  
189 [49], as part of a high-throughput pipeline [50]. Assemblies were annotated automatically  
190 using Prokka v1.5 [51] and a genus-specific reference database [52]. If raw sequencing reads  
191 were unavailable for genome sequences, assemblies were downloaded and similarly  
192 annotated using the automated Prokka-based pipeline.

193

194 **Pangenome and phylogenetic calculations**

195 A pangenome was produced from 198 Prokka-annotated genome assemblies using Roary  
196 v3.12.0 [53] (parameters '-p 10 -e --mafft -s -cd 97'). A core-gene alignment of 2,520 genes  
197 and 1,096,140 nucleotides was produced from this pangenome calculation. The alignment

198 was trimmed using trimAl v1.4.1 [54] and used to produce an alignment of 183,896 SNVs  
199 using SNP-sites v2.5.1 [55]. A maximum-likelihood phylogeny was produced using IQ-Tree  
200 v1.6.10 [56] from the SNV-only alignment (options '-nt 10 -m GTR+ASC -bb 5000 -alrt  
201 5000').

202

### 203 **Protein sequence alignments, domain prediction, and comparative genomics**

204 Protein sequences were aligned using BLASTp [57] and were annotated using the  
205 InterProScan web server [58]. Comparative genomic figures were generated using BLASTn  
206 [57] sequence alignments and visualised using ACT v13 and v18.0.2 [59], and Easyfig v2.2.2  
207 [60].

208

### 209 **Confirmation of gene presence/absence by mapping**

210 Reads were mapped to reference sequences using SMALT v0.7.4  
211 (<https://www.sanger.ac.uk/tool/smalt-0/>) and the method described by Harris et al. [61], as  
212 part of automated analysis pipelines run by Wellcome Sanger Institute Pathogen Informatics.  
213 All of the software developed by Pathogen Informatics is freely available for download from  
214 GitHub under an open source license, GNU GPL 3 ([https://github.com/sanger-pathogens/vr-  
215 codebase](https://github.com/sanger-pathogens/vr-codebase)). Ordered BAM files were visualised against reference sequences using Artemis  
216 v16 and v18.0.2, which incorporates BamView [62, 63].

217

### 218 **Molecular cloning**

219 Plasmid DNA was extracted from *E. coli* using the QIAprep Spin Miniprep kit (Qiagen,  
220 #27104). Genomic DNA (gDNA) was extracted from NCTC 30 as described previously [64].  
221 Cloning intermediates were purified using the QIAquick PCR Purification kit (Qiagen,  
222 #28104).

223

224 gDNA from NCTC 30 was used as a template from which to amplify *chiA-3* using primers  
225 oMJD202 and oMJD203, high-fidelity Phusion Hot Start Flex polymerase (NEB #M0535S)  
226 using the supplied GC buffer, DMSO (3% v/v final conc.) and dNTPs (Thermo Scientific,  
227 #R0191). Twenty-nine PCR cycles were performed using the manufacturer's protocol  
228 (annealing temperature: 55 °C, extension time: 2 min). The amplicon was purified and  
229 digested using 30 units of SacI-HF and SalI-HF (NEB, #R3156S and R3138S respectively) at  
230 37 °C for 45 min. pBAD33 was similarly treated with SacI-HF and SalI-HF, and after 15 min  
231 incubation at 37 °C, the plasmid digestion was supplemented with 1.5 units of recombinant  
232 shrimp alkaline phosphatase (rSAP; NEB #M0371S). Digested insert and vector were  
233 purified and ligated together at room temperature for 30 min using T4 DNA ligase (NEB,  
234 #M0202S) in approximately a 3:1 molar ratio. Chemically competent 10-beta *E. coli* (NEB,  
235 #C3019I) were transformed with ligated DNA according to the manufacturer's instructions,  
236 and transformants were selected for on LB agar supplemented with chloramphenicol (10  
237 µg/ml).

238

239 Chloramphenicol-resistant colonies were resuspended in 30 µl PBS. A screen for clones  
240 containing an insert into pBAD33 was carried out using 1 µl of this suspension as a PCR  
241 template using primers oMJD204 and oMJD205 and OneTaq Quickload 2X Master Mix  
242 (NEB, #M0486S), according to the manufacturer's instructions (annealing temperature 45 °C,  
243 extension time 3 min). Plasmids were extracted from overnight cultures of clones from which  
244 PCR produced an amplicon of the expected size (1,548 bp). The presence of an insertion into  
245 pBAD33 was verified by digesting purified plasmid DNA with SacI-HF and SalI-HF as  
246 described above. Plasmids were then sequence-confirmed by amplicon sequencing  
247 (GATC/Eurofins) in both directions across the pBAD33 multiple cloning site using primers

248 oMJD204 and oMJD205. Sequence-verified plasmids were transformed into chemically  
249 competent NiCo21(DE3) cells (NEB, #C2529H) following the manufacturer's instructions,  
250 and these transformants were used for protein expression purposes.

251

## 252 **Protein expression and immunoblotting**

253 Single colonies of NiCo21(DE3) harbouring pMJD157 and pBAD33 (empty vector) were  
254 inoculated into 3 ml LB-Cm and cultured at 37 °C with shaking (200 rpm) for eight hours.  
255 These were then diluted 1:100 into baffled flasks containing 25 ml LB-Cm supplemented  
256 with either  $\square$ -(+)-glucose (BDH, #101176K) or  $\square$ -(+)-arabinose (Sigma-Aldrich, #A3256),  
257 both at 0.4% w/v final concentration. These cultures were grown for 18 hours at 23 °C with  
258 shaking (200 rpm). Cells were collected by centrifugation (3,900 x g, 5 min) and the  
259 supernatant was filter-sterilised (0.22  $\mu$ m) and stored at -20 °C. Cell pellets were lysed in 3  
260 ml BugBuster HT (Millipore, #70922-4) for 30 min at room temperature on a rotator. Debris  
261 was collected by centrifugation (3,900 x g, 5 min) and discarded. Lysates were stored at -20  
262 °C.

263

264 Sixty microlitres of filtered supernatants and lysates was mixed 1:1 with 2X tris-glycine-SDS  
265 sample buffer (Invitrogen, #LC2676), boiled at 100 °C for 5 min, and 30  $\mu$ l of each sample  
266 was used to load duplicate NuPAGE 4-12% Bis-Tris acrylamide gels (Invitrogen, #NP0321)  
267 which were electrophoresed simultaneously, in the same gel tank. Stained and unstained  
268 protein ladders (NEB; #P7719S and #P7717S; Invitrogen, #LC5925) were used for size  
269 estimation where appropriate. One gel of the pair was stained with InstantBlue (Expedon,  
270 #ISB1L) according to the manufacturer's instructions prior to imaging; the other was used for  
271 Western immunoblotting.

272

273 For Western blotting, electrophoresed proteins were transferred from an acrylamide gel onto  
274 a nitrocellulose membrane using the iBlot 2 dry blotting system and transfer stack  
275 (ThermoFisher, #IB21001 and #IB23001). After transfer, the membrane was blocked for  
276 three hours in 5% w/v Marvel milk powder dissolved in PBS-Tween 20 (Marvel-PBS-T) at 4  
277 °C, with rocking. An antibody recognising the 6xHis epitope and directly conjugated to  
278 horseradish peroxidase (Abcam, #ab1187) was diluted in Marvel-PBS-T to the  
279 manufacturer's instructions and used to probe the membrane for 30 min at 4 °C, with rocking.  
280 The membrane was then washed in PBS-T for 15 min three times, and then incubated with  
281 Clarity Western ECL substrate (Bio-Rad, #170-5060) for 5 min. Luminescence signal was  
282 allowed to decay overnight, and the blot was then imaged with Amersham Hyperfilm ECL  
283 film (GE, #28906836). Coloured protein size standards were marked manually on the  
284 developed film.

285

#### 286 **Chitinase assay**

287 Chitinase activity was assayed using fluorogenic substrates (Sigma-Aldrich, #CS1030). The  
288 kit was used according to the manufacturer's instructions, with the following modifications:  
289 Ten microlitres of cell lysate or supernatant was used per assay well. Five microlitres of the  
290 supplied chitinase control enzyme was used per positive control reaction, rather than a 1:200  
291 dilution of the control enzyme, to ensure that fluorescence was detectable. Assays were  
292 carried out in black Nunc flat-bottomed microtitre plates (Sigma-Aldrich, #P8741), and  
293 technical triplicates were included for each sample. Once mixed, reaction plates were  
294 incubated for 30 min (37 °C, static) before the addition of stop solution. Fluorescence was  
295 measured using a FLUOstar<sup>®</sup> Omega plate reader (BMG LabTech), set to excitation and  
296 emission wavelengths of 360 and 450 nm, respectively. A 1% gain was applied to the

297 fluorescence measured by the reader. Blank fluorescence was subtracted from each sample  
298 reading prior to analysis.

299

### 300 **Statistics, data visualisation, and figure generation**

301 Figures were produced using R v3.5.1 [65], ggpubr v0.2.3  
302 (<https://github.com/kassambara/ggpubr>), ggplot2 v3.2.1 [66], ggforce v0.3.1.9000  
303 (<https://github.com/thomasp85/ggforce>), and the Phandango web server [67]. Statistical tests  
304 were performed using R v3.5.1 [65]. Where required, figures were modified manually using  
305 InkScape v0.92.4 and Adobe Illustrator CC v23.1.1.

## 306 **Results**

### 307 **Distribution of chitinase genes amongst *V. cholerae***

308 The key components of *V. cholerae* chitin catabolism summarised in Figure 1 have been  
309 previously described [23, 44, 68]. The presence and absence of orthologues of each of the  
310 principal chitin-binding proteins and extracellular chitinases [44] known to be encoded by the  
311 *V. cholerae* 7PET reference strain N16961 (based on their N16961 locus identifiers) were  
312 identified in a pangenome calculated from 195 *V. cholerae* genomes, plus three *Vibrio* spp.  
313 genomes used as an outgroup (Supplementary Table 1). Genes that were annotated as  
314 encoding putative chitinases, as well as those genes known to be present in N16961, were  
315 identified in the pangenome (Supplementary Tables 2, 3). A *V. cholerae* phylogenetic tree  
316 was calculated using an SNV-only alignment of 2,520 core genes taken from the pangenome,  
317 and the distribution of these chitinase genes across the phylogeny is presented in Figure 2.

318

### 319 ***gbpA* is not universally present amongst diverse *V. cholerae***

320 The first, and most striking, observation made from these data was that *gbpA* (*VCA\_0811*) did  
321 not appear to be ubiquitous amongst all of the *V. cholerae* genomes included in this study.  
322 We found that *gbpA* was present in only 189 of 195 *V. cholerae* genomes (96.9%; Figure 2,  
323 Supplementary Table 2). We manually inspected the genome assembly for each isolate which  
324 lacked *gbpA*, to guard against this being an artefact of the computational approach taken  
325 (Figure 3).

326

327 Three genomic arrangements were observed at this locus – the presence of an intact  
328 *VC\_A0811* locus as found in *gbpA*<sup>+</sup> genomes, a deletion of *gbpA* and two adjacent genes  
329 (*VC\_A0811-VC\_A0813*), and the replacement of these three genes with additional sequence  
330 in the genome of NCTC 30 (Figure 3). In order to ensure that the *VC\_A0811-VC\_A0813*

331 genes were not present at a different position in the NCTC 30 genome, we mapped the  
332 Illumina short-reads for this isolate to the N16961 reference sequence and inspected the  
333 mapping coverage across this region. This confirmed that the absence of the genes  
334 *VC\_A0811-VC\_A0813* from NCTC 30 was not a result of a mis-assembly (Supplementary  
335 Figure 1). The two genes adjacent to *gpbA*, *VC\_A0812* and *VC\_A0813*, encode LapX and  
336 Lap, respectively. Both genes are putatively regulated by the HapR master quorum-sensing  
337 regulator, and encode proteins that were detected in an *hapA* mutant [69]. Both Lap and  
338 LapX were found to be putative components of the Type 2 secretome in N16961 [70], and  
339 *lap* has been used as a polymorphic locus in multilocus enzyme electrophoresis MLEE  
340 schemes for classifying *V. cholerae* [71, 72]. We were unable to find published evidence  
341 linking these genes to GbpA activity or chitin adhesion more generally, though we note that  
342 *lap* and *lapX* are oriented in the same direction as *gpbA*, and we cannot exclude the  
343 possibility that these three genes are co-regulated or co-transcribed.

344

#### 345 ***chiA-2*, but not *chiA-1*, is ubiquitous amongst diverse *V. cholerae***

346 In contrast to *gpbA*, we found that *VC\_A0027* (encoding ChiA-2) was near-ubiquitous, being  
347 detected in 192/195 *V. cholerae* (Figure 2; Supplementary Table 2). Manual inspection of the  
348 assemblies for those three isolates which appeared to lack the gene confirmed that the  
349 majority of this gene was in fact present; assembly and resultant annotation errors were likely  
350 to be responsible for this result (data not shown). This suggests that *VC\_A0027* is core to *V.*  
351 *cholerae*, which is consistent with this being the most highly-expressed chitinase enzyme in  
352 the species, and with the observation that deletion of this gene alone causes a significant  
353 growth defect on minimal media containing chitin as a sole carbon source [44].

354



355 However, although *VC\_1952* (ChiA-1) was present in all pandemic isolates (defined as those  
356 isolates which were members of the 7PET and Classical lineages), it was not ubiquitous  
357 across the species, and was only identified in 61.2% of the non-pandemic *V. cholerae* in this  
358 dataset (101/165; Figure 2; Supplementary Table 2). This observation was surprising,  
359 because both ChiA-1 and ChiA-2 have been shown to be necessary for *V. cholerae* N16961  
360 to grow in media supplemented with colloidal chitin [23]. Keymer and colleagues previously  
361 observed, using microarray approaches, that some diverse environmental isolates of *V.*  
362 *cholerae* varied in terms of their *VC\_1952* genotype [73]. We propose that our data  
363 recapitulate this observation, albeit *in silico*. We manually examined the region surrounding  
364 the *VC\_1952* locus in a subset of the genome assemblies for isolates lacking this gene, and  
365 found both that the gene was absent in its entirety, and that this did not appear to affect the  
366 genes adjacent to *chiA-1* (Figure 4; Supplementary Figure 2). Moreover, the distribution of  
367 putative chitinases (Figure 2) suggested that isolates lacking ChiA-1 may encode additional  
368 chitinases. Since ChiA-1 is known to have a functional role in *V. cholerae* chitin metabolism,  
369 this led us to speculate that these additional putative chitinases, if functional, might be able to  
370 provide chitinase activity in the absence of ChiA-1.

371

### 372 **Identification and characterisation of *chiA-3***

373 Eleven gene clusters in the pangenome included genes with the annotation “chitinase” or  
374 “putative chitinase” (Supplementary Table 3). Five of these were found only in one genome,  
375 of which four were found only in the non-*V. cholerae* outgroup. Of the remaining six genes,  
376 four are known to be present in N16961 (Supplementary Tables 2 and 3). On further  
377 examination, the products of one of the two gene clusters, ‘endo I\_2’, were not predicted *in*  
378 *silico* to contain a chitinase domain, although a putative chitin-binding domain was identified  
379 (Supplementary Figure 3; Supplementary Table 3).

380

381 The second gene identified was predicted to encode a protein containing a chitinase domain  
382 (Figure 5a). The molecular weight (47.69 kDa) and domain composition of the protein were  
383 distinct from those of *chiA-2* and *chiA-1* (Figure 5a), as was the genomic context and location  
384 of the gene, which was inserted between *VC\_A0620* and *VC\_A0621* on chromosome 2  
385 (Figure 5b). This gene was therefore referred to as *chiA-3*, to differentiate it from the two  
386 previously-described genes. *chiA-3* was identified in 87 genomes, and was absent from all of  
387 the genomes belonging to both pandemic *V. cholerae* lineages included in this study.  
388 Additionally, 57 of the 67 isolates which lacked *chiA-1* harboured *chiA-3* (85.0%).

389

390 In order to determine whether *chiA-3* had been identified previously in other *Vibrio* species,  
391 the gene was compared to the nine genes listed by Hunt *et al* as chitinases found in non-  
392 cholera Vibrios [19] (Table 2). The most similar protein to ChiA-3 (76.57% aa identity) was  
393 that encoded by *VPA1177* (*chiA*, accession # BAC62520.1), found in *V. parahaemolyticus*  
394 strain RIMD 2210633 (Table 2) [74]. *VPA1177* encodes a 430 aa protein (47.98 kDa) which  
395 previous genetic analyses have shown to make a minimal contribution to the ability of *V.*  
396 *parahaemolyticus* to degrade chitin – ChiA-2 (encoded by *VPA0055*, accession #  
397 BAC61398.1) is the major protein responsible for this phenotype in *V. parahaemolyticus*  
398 [75]. Transcription of *VPA1177* has been shown to be significantly reduced in the presence of  
399 chitin [75], however, the *VPA1177* protein has been shown to be expressed by *V.*  
400 *parahaemolyticus*, albeit at very low levels in culture supernatants [35].

401

402 A previous report had also identified a functional secreted chitinase from *Vibrio harveyi* of a  
403 similar molecular weight (47 kDa) to both *VPA1177* and ChiA-3 [76]. The *V. harveyi* ATCC  
404 33843 genome [77] contains a gene encoding a putative chitinase (BLASTp: 100% query

405 coverage, 77.73% amino acid identity to ChiA-3; predicted molecular weight 48.0 kDa) in a  
406 similar genomic context on chromosome 2 to that of *chiA-3* in NCTC 30 (Figure 5b). This is  
407 distinct from the location of the functionally-characterised *chiA* gene (*LA59\_20935*) which  
408 encodes an 850 aa ChiA chitinase precursor (accession # Q9AMP1 [36, 78, 79]), and from  
409 other functionally-characterised *V. harveyi*  $\beta$ -*N*-acetylglucosaminidases [37]. This *V. harveyi*  
410 protein is also 90.9% identical to VPA1177. As well as their high amino acid identity, each of  
411 these proteins were predicted to contain similar domain compositions and configurations  
412 across the three species (Supplementary Figure 4). It is reasonable to infer that these enzymes  
413 are orthologues of ChiA-3.

414

415 Since *VPA1177* has been shown to be transcribed [75] and to produce a translated protein in  
416 *V. parahaemolyticus* [35], we sought to determine whether the product of *chiA-3* from *V.*  
417 *cholerae* had chitinase activity. We amplified the gene from the genome of NCTC 30, a non-  
418 pandemic lineage *V. cholerae*, and cloned it directionally into pBAD33 such that expression  
419 of the gene was governed by the arabinose-inducible P<sub>BAD</sub> promoter and the translated  
420 product linked to a C-terminal 6xHis tag, similar to previous reports [39, 44] (denoted  
421 pMJD157, Figure 6a).

422

423 *E. coli* harbouring pMJD157 produced a His-tagged protein of the expected molecular weight  
424 that was retained in the cell pellet when cultured with arabinose at 23 °C (Figure 6b). We  
425 used a commercial fluorogenic assay for chitinase activity which relies on the hydrolysis of  
426 4-methylumbelliferyl (4-MU) chitin analogues to detect chitinase activity. A similar assay  
427 has been used previously to assay chitinase activity in Vibrios [76]. We found that samples  
428 from *E. coli* cultures expressing 6xHis-tagged ChiA-3 demonstrated statistically significant  
429 activity on 4-MU-linked substrates (Figure 7). These data were consistent with the His-

430 tagged protein detected in Figure 6c (ChiA-3-6xHis) having endochitinase and chitobiosidase  
431 activities, but lacking  $\beta$ -*N*-acetylglucosaminidase activity.

432 **Discussion**

433 In this study, we present three major observations – firstly, that *gbpA* is not ubiquitous  
434 amongst *V. cholerae*. Second, we show that there is additional variability in the chitinase  
435 genes harboured by diverse *V. cholerae*, which show phylogenetic signals in their  
436 distribution. Third, we present functional evidence that one of these putatively-novel genes  
437 encodes a protein with chitinase activity.

438

439 The fact that *gbpA* is not present in all *V. cholerae* is important, given that *gbpA* had  
440 previously been suggested to be a candidate diagnostic gene for the detection of *V. cholerae*  
441 [80, 81]. This was based both on the high level of conservation of *gbpA* amongst tested *V.*  
442 *cholerae*, and on the number of differences between *gbpA* in *V. cholerae* and alleles found in  
443 other *Vibrio* species [80]. In addition to our results, others have noted that *gbpA* can be found  
444 in non-cholera *Vibrios* and in non-pathogenic *V. cholerae*, suggesting that this makes *gbpA*  
445 an unreliable marker for quantitative study of *V. cholerae* [82].

446

447 The biological consequences of the absence of *gbpA* from these bacteria is interesting to  
448 consider. As discussed previously, GbpA is an important factor in both environmental and  
449 pathogenic colonisation. The fact that *gbpA* is absent from non-pandemic *V. cholerae* that  
450 appear to be basal to the rest of the species (Figure 2) suggests that its role in pathogenicity  
451 may be more complex than previously thought. It might be that acquisition of *gbpA* by *V.*  
452 *cholerae* was an important step in its evolution as a human pathogen. Conversely, since  
453 several of the isolates in the lineage lacking *gbpA* are of clinical as well as environmental  
454 origin [8, 64, 83–85], including some which were isolated from cases of acute or ‘choleraic’  
455 diarrhoea [64, 83, 84], it might be that *gbpA* may not be essential for pathogenic colonisation.  
456 It remains to be seen whether the natural absence of *gbpA* affects the ability of such *V.*

457 *cholerae* to colonise both the intestinal mucosa and chitinous surfaces. The roles played by  
458 other adhesins in these diverse *V. cholerae*, such as MSHA, should also be considered in the  
459 future.

460

461 Although ChiA-3 orthologues have been examined in other Vibrios, we believe that this is  
462 the first report of this gene in *V. cholerae*, and the first report that the *V. cholerae chiA-3* gene  
463 encodes a functional chitinase. The fact that *chiA-3* was found only in non-pandemic *V.*  
464 *cholerae* is also intriguing. It is not yet known whether non-pandemic *V. cholerae* harbouring  
465 *chiA-3* can respire chitin as effectively, or more effectively, than N16961 or other laboratory  
466 strains. However, it could be speculated that ChiA-3 might be more suited to environmental  
467 survival than ChiA-1 (e.g., lower temperatures, higher salinity than the human intestine).  
468 Although such investigations were outside the scope of this current study, quantifying the  
469 relative activities of ChiA-3 and ChiA-1, and determining genetically whether *chiA-3* can  
470 complement the loss of *chiA-1* from *V. cholerae*, or if isolates that harbour both *chiA-1* and  
471 *chiA-3* (Figure 2; Supplementary Table 1) have an enhanced chitin degradation phenotype, is  
472 the subject of future research.

473

474 There are fundamental differences between *V. cholerae* from pandemic and non-pandemic  
475 lineages, both in terms of their ability to cause cholera epidemics, and their basic biology. We  
476 still do not fully understand these differences, but in order to do so, we must study *V.*  
477 *cholerae* pathogenicity in conjunction with more fundamental biological processes. It is  
478 currently unclear whether variation in the complements of chitinases and chitin-binding  
479 proteins encoded by *V. cholerae* have physiological consequences for different lineages of  
480 the species. However, given the importance of these genes to pathogenicity [29, 39],  
481 environmental lifestyles [23], and natural competence [28], it is plausible that these

482 differences reflect differences in the ecological niches occupied by different lineages of the  
483 species. Research in this area may provide further insights into the genetic and biochemical  
484 differences between *V. cholerae* lineages that cause dramatically different patterns of disease  
485 worldwide. Collectively, these findings underline the fact that, as we continue to study  
486 diverse *V. cholerae*, our understanding of the nuance and specifics of this species will  
487 improve and be refined.

488

489 **Author statements**

490 **Author contributions**

491 N.R.T. supervised the work. T.G.F. performed genomic analysis with assistance from M.J.D.  
492 and G.A.B.. M.J.D. carried out experimental work. T.G.F. and M.J.D. wrote the manuscript,  
493 with major contributions from N.R.T.. All authors interpreted the results, contributed to the  
494 editing of the manuscript, and read and approved the final version of the manuscript.

495

496 **Conflicts of interest**

497 The authors declare no conflicts of interest.

498

499 **Funding information**

500 This work was supported by Wellcome (grant 206194). T.G.F. was supported by an Amgen  
501 Foundation Scholarship to the University of Cambridge. M.J.D. is a Junior Research Fellow  
502 at Churchill College, Cambridge, and was supported previously by a Wellcome Sanger  
503 Institute PhD Studentship. G.A.B. is an EBI-Sanger Postdoctoral (ESPOD) Fellow.

504

505 **Acknowledgements**

506 We thank Rita Monson for helpful discussions and comments throughout the project. We  
507 thank Sally Kay for logistical support, Charlotte Tolley for the gift of reagents, and the  
508 Wellcome Sanger Institute (WSI) Pathogen Informatics team for help with data management.  
509 We also thank the WSI Parasites and Microbes Administration team, particularly Kate Auger  
510 and Joseph Woolfolk, for operational and administrative assistance in the course of this work.

511



512 **References**

- 513 1. **Morris JG, Black RE.** Cholera and other vibrioses in the United States. *N Engl J Med*  
514 1985;312:343–350.
- 515 2. **Pollitzer R, Swaroop S, Burrows W, World Health Organization.** *Cholera*. World  
516 Health Organization. <https://apps.who.int/iris/handle/10665/41711> (1959, accessed 2  
517 October 2019).
- 518 3. **Kaper JB, Morris JG, Levine MM.** Cholera. *Clin Microbiol Rev* 1995;8:48–86.
- 519 4. **Devault AM, Golding GB, Waglechner N, Enk JM, Kuch M, et al.** Second-pandemic  
520 strain of *Vibrio cholerae* from the Philadelphia cholera outbreak of 1849. *N Engl J Med*  
521 2014;370:334–340.
- 522 5. **Cvjetanovic B, Barua D.** The seventh pandemic of cholera. *Nature* 1972;239:137–138.
- 523 6. **Furniss AL, Lee JV, Donovan TJ.** *The Vibrios*. London: His Majesty's Stationery Office  
524 (H.M.S.O); 1978.
- 525 7. **Weill F-X, Domman D, Njamkepo E, Tarr C, Rauzier J, et al.** Genomic history of the  
526 seventh pandemic of cholera in Africa. *Science* 2017;358:785–789.
- 527 8. **Domman D, Quilici ML, Dorman MJ, Njamkepo E, Mutreja A, et al.** Integrated view  
528 of *Vibrio cholerae* in the Americas. *Science* 2017;358:789–793.
- 529 9. **Oprea M, Njamkepo E, Cristea D, Zhukova A, Clark CG, et al.** The seventh pandemic  
530 of cholera in Europe revisited by microbial genomics. *Nat Commun* 2020;11:5347.
- 531 10. **Mutreja A, Kim DW, Thomson NR, Connor TR, Lee JH, et al.** Evidence for  
532 several waves of global transmission in the seventh cholera pandemic. *Nature*  
533 2011;477:462–465.
- 534 11. **Karlsson SL, Thomson N, Mutreja A, Connor T, Sur D, et al.** Retrospective  
535 analysis of serotype switching of *Vibrio cholerae* O1 in a cholera endemic region shows it  
536 is a non-random process. *PLoS Negl Trop Dis* 2016;10:e0005044.
- 537 12. **Chun J, Grim CJ, Hasan NA, Lee JH, Choi SY, et al.** Comparative genomics  
538 reveals mechanism for short-term and long-term clonal transitions in pandemic *Vibrio*  
539 *cholerae*. *Proc Natl Acad Sci USA* 2009;106:15442–15447.
- 540 13. **Clemens JD, Nair GB, Ahmed T, Qadri F, Holmgren J.** Cholera. *Lancet*  
541 2017;390:1539–1549.
- 542 14. **Jones MK, Oliver JD.** *Vibrio vulnificus*: Disease and pathogenesis. *Infect Immun*  
543 2009;77:1723–1733.
- 544 15. **Daniels NA, MacKinnon L, Bishop R, Altekruse S, Ray B, et al.** *Vibrio*  
545 *parahaemolyticus* infections in the United States, 1973–1998. *J Infect Dis* 2000;181:1661–  
546 1666.

- 547 16. **Goarant C, Reynaud Y, Ansquer D, Decker S de, Saulnier D, et al.** Molecular  
548 epidemiology of *Vibrio nigripulchritudo*, a pathogen of cultured penaeid shrimp  
549 (*Litopenaeus stylirostris*) in New Caledonia. *Syst Appl Microbiol* 2006;29:570–580.
- 550 17. **Goarant C, Ansquer D, Herlin J, Domalain D, Imbert F, et al.** “Summer  
551 Syndrome” in *Litopenaeus stylirostris* in New Caledonia: Pathology and epidemiology of  
552 the etiological agent, *Vibrio nigripulchritudo*. *Aquaculture* 2006;253:105–113.
- 553 18. **Frans I, Michiels CW, Bossier P, Willems KA, Lievens B, et al.** *Vibrio*  
554 *anguillarum* as a fish pathogen: Virulence factors, diagnosis and prevention. *J Fish Dis*  
555 2011;34:643–661.
- 556 19. **Hunt DE, Gevers D, Vahora NM, Polz MF.** Conservation of the chitin utilization  
557 pathway in the *Vibrionaceae*. *Appl Environ Microbiol* 2008;74:44–51.
- 558 20. **Keyhani NO, Roseman S.** Physiological aspects of chitin catabolism in marine  
559 bacteria. *Biochim Biophys Acta - Gen Subj* 1999;1473:108–122.
- 560 21. **Froelich B, Oliver J.** Increases in the amounts of *Vibrio* spp. in oysters upon addition  
561 of exogenous bacteria. *Appl Environ Microbiol* 2013;79:5208–5213.
- 562 22. **Kaneko T, Colwell RR.** Adsorption of *Vibrio parahaemolyticus* onto chitin and  
563 copepods. *Appl Microbiol* 1975;29:269–274.
- 564 23. **Meibom KL, Li XB, Nielsen AT, Wu C-Y, Roseman S, et al.** The *Vibrio cholerae*  
565 chitin utilization program. *Proc Natl Acad Sci USA* 2004;101:2524–2529.
- 566 24. **Nalin DR, Daya V, Reid A, Levine MM, Cisneros L.** Adsorption and growth of  
567 *Vibrio cholerae* on chitin. *Infect Immun* 1979;25:768–770.
- 568 25. **Huq A, Small EB, West PA, Huq MI, Rahman R, et al.** Ecological relationships  
569 between *Vibrio cholerae* and planktonic crustacean copepods. *Appl Environ Microbiol*  
570 1983;45:275–283.
- 571 26. **Lo Scudato M, Blokesch M.** A transcriptional regulator linking quorum sensing and  
572 chitin induction to render *Vibrio cholerae* naturally transformable. *Nucleic Acids Res*  
573 2013;41:3644–3658.
- 574 27. **Antonova ES, Hammer BK.** Genetics of natural competence in *Vibrio cholerae* and  
575 other *Vibrios*. *Microbiol Spectr* 2015;3. DOI: 10.1128/microbiolspec.VE-0010-2014.
- 576 28. **Meibom KL, Blokesch M, Dolganov NA, Wu C-Y, Schoolnik GK.** Chitin induces  
577 natural competence in *Vibrio cholerae*. *Science* 2005;310:1824–1827.
- 578 29. **Mondal M, Nag D, Koley H, Saha DR, Chatterjee NS.** The *Vibrio cholerae*  
579 extracellular chitinase ChiA2 is important for survival and pathogenesis in the host  
580 intestine. *PLoS ONE* 2014;9:e103119.
- 581 30. **Conner JG, Teschler JK, Jones CJ, Yildiz FH.** Staying alive: *Vibrio cholerae*’s  
582 cycle of environmental survival, transmission, and dissemination. *Microbiol Spectr*  
583 2016;4. DOI: 10.1128/microbiolspec.VMBF-0015-2015.

- 584 31. **Keyhani NO, Roseman S.** The chitin catabolic cascade in the marine bacterium  
585 *Vibrio furnissii*: Molecular cloning, isolation, and characterization of a periplasmic  $\beta$ -N-  
586 acetylglucosaminidase. *J Biol Chem* 1996;271:33425–33432.
- 587 32. **Keyhani NO, Roseman S.** The chitin catabolic cascade in the marine bacterium  
588 *Vibrio furnissii*: Molecular cloning, isolation, and characterization of a periplasmic  
589 chitodextrinase. *J Biol Chem* 1996;271:33414–33424.
- 590 33. **Chitlaru E, Roseman S.** Molecular cloning and characterization of a novel  $\beta$ -N-  
591 acetyl-D-glucosaminidase from *Vibrio furnissii*. *J Biol Chem* 1996;271:33433–33439.
- 592 34. **Jung B-O, Roseman S, Park JK.** The central concept for chitin catabolic cascade in  
593 marine bacterium, Vibrios. *Macromol Res* 2008;16:1–5.
- 594 35. **Hirano T, Okubo M, Tsuda H, Yokoyama M, Hakamata W, et al.** Chitin  
595 heterodisaccharide, released from chitin by chitinase and chitin oligosaccharide  
596 deacetylase, enhances the chitin-metabolizing ability of *Vibrio parahaemolyticus*. *J*  
597 *Bacteriol* 2019;201. DOI: 10.1128/JB.00270-19.
- 598 36. **Suginta W, Vongsuwan A, Songsiriritthigul C, Prinz H, Estibeiro P, et al.** An  
599 endochitinase A from *Vibrio carchariae*: Cloning, expression, mass and sequence  
600 analyses, and chitin hydrolysis. *Arch Biochem Biophys* 2004;424:171–180.
- 601 37. **Suginta W, Chuenark D, Mizuhara M, Fukamizo T.** Novel  $\beta$ -N-  
602 acetylglucosaminidases from *Vibrio harveyi* 650: Cloning, expression, enzymatic  
603 properties, and subsite identification. *BMC Biochem* 2010;11:40.
- 604 38. **Wortman AT, Somerville CC, Colwell RR.** Chitinase determinants of *Vibrio*  
605 *vulnificus*: Gene cloning and applications of a chitinase probe. *Appl Environ Microbiol*  
606 1986;52:142–145.
- 607 39. **Kirn TJ, Jude BA, Taylor RK.** A colonization factor links *Vibrio cholerae*  
608 environmental survival and human infection. *Nature* 2005;438:863–866.
- 609 40. **Bhowmick R, Ghosal A, Das B, Koley H, Saha DR, et al.** Intestinal adherence of  
610 *Vibrio cholerae* involves a coordinated interaction between colonization factor GbpA and  
611 mucin. *Infect Immun* 2008;76:4968–4977.
- 612 41. **Wong E, Vaaje-Kolstad G, Ghosh A, Hurtado-Guerrero R, Konarev PV, et al.**  
613 The *Vibrio cholerae* colonization factor GbpA possesses a modular structure that governs  
614 binding to different host surfaces. *PLoS Pathog* 2012;8:e1002373.
- 615 42. **Loose JSM, Forsberg Z, Fraaije MW, Eijsink VGH, Vaaje-Kolstad G.** A rapid  
616 quantitative activity assay shows that the *Vibrio cholerae* colonization factor GbpA is an  
617 active lytic polysaccharide monoxygenase. *FEBS Lett* 2014;588:3435–3440.
- 618 43. **Jude BA, Martinez RM, Skorupski K, Taylor RK.** Levels of the secreted *Vibrio*  
619 *cholerae* attachment factor GbpA are modulated by quorum-sensing-induced proteolysis. *J*  
620 *Bacteriol* 2009;191:6911–6917.
- 621 44. **Hayes CA, Dalia TN, Dalia AB.** Systematic genetic dissection of chitin degradation  
622 and uptake in *Vibrio cholerae*. *Environ Microbiol* 2017;19:4154–4163.

- 623 45. **Li X, Roseman S.** The chitinolytic cascade in *Vibrios* is regulated by chitin  
624 oligosaccharides and a two-component chitin catabolic sensor/kinase. *Proc Natl Acad Sci*  
625 *USA* 2004;101:627–631.
- 626 46. **Dalia AB.** RpoS is required for natural transformation of *Vibrio cholerae* through  
627 regulation of chitinases. *Environ Microbiol* 2016;18:3758–3767.
- 628 47. **Connell TD, Metzger DJ, Lynch J, Folster JP.** Endochitinase is transported to the  
629 extracellular milieu by the *eps*-encoded general secretory pathway of *Vibrio cholerae*. *J*  
630 *Bacteriol* 1998;180:5591–5600.
- 631 48. **Soysa HSM, Aunkham A, Schulte A, Suginta W.** Single-channel properties, sugar  
632 specificity, and role of chitoporin in adaptive survival of *Vibrio cholerae* type strain O1. *J*  
633 *Biol Chem* 2020;295:9421–9432.
- 634 49. **Bankevich A, Nurk S, Antipov D, Gurevich AA, Dvorkin M, et al.** SPAdes: A new  
635 genome assembly algorithm and its applications to single-cell sequencing. *J Comput Biol*  
636 2012;19. Epub ahead of print 2012. DOI: 10.1089/cmb.2012.0021.
- 637 50. **Page AJ, De Silva N, Hunt M, Quail MA, Parkhill J, et al.** Robust high-throughput  
638 prokaryote *de novo* assembly and improvement pipeline for Illumina data. *Microb Genom*  
639 2016;2:e000083.
- 640 51. **Seemann T.** Prokka: Rapid prokaryotic genome annotation. *Bioinformatics*  
641 2014;30:2068–2069.
- 642 52. **O’Leary NA, Wright MW, Brister JR, Ciuffo S, Haddad D, et al.** Reference  
643 sequence (RefSeq) database at NCBI: Current status, taxonomic expansion, and functional  
644 annotation. *Nucleic Acids Res* 2016;44:D733–D745.
- 645 53. **Page AJ, Cummins CA, Hunt M, Wong VK, Reuter S, et al.** Roary: Rapid large-  
646 scale prokaryote pan genome analysis. *Bioinformatics* 2015;31:3691–3693.
- 647 54. **Capella-Gutiérrez S, Silla-Martínez JM, Gabaldón T.** trimAl: A tool for  
648 automated alignment trimming in large-scale phylogenetic analyses. *Bioinformatics*  
649 2009;25:1972–1973.
- 650 55. **Page AJ, Taylor B, Delaney AJ, Soares J, Seemann T, et al.** SNP-sites: Rapid  
651 efficient extraction of SNPs from multi-FASTA alignments. *Microb Genom* 2016;2. DOI:  
652 10.1099/mgen.0.000056.
- 653 56. **Nguyen L-T, Schmidt HA, von Haeseler A, Minh BQ.** IQ-TREE: A fast and  
654 effective stochastic algorithm for estimating maximum-likelihood phylogenies. *Mol Biol*  
655 *Evol* 2015;32:268–274.
- 656 57. **Altschul SF, Gish W, Miller W, Myers EW, Lipman DJ.** Basic local alignment  
657 search tool. *J Mol Biol* 1990;215:403–410.
- 658 58. **Jones P, Binns D, Chang H-Y, Fraser M, Li W, et al.** InterProScan 5: Genome-  
659 scale protein function classification. *Bioinformatics* 2014;30:1236–1240.

- 660 59. **Carver TJ, Rutherford KM, Berriman M, Rajandream M-A, Barrell BG, et al.**  
661 ACT: The Artemis comparison tool. *Bioinformatics* 2005;21:3422–3423.
- 662 60. **Sullivan MJ, Petty NK, Beatson SA.** Easyfig: A genome comparison visualizer.  
663 *Bioinformatics* 2011;27:1009–1010.
- 664 61. **Harris SR, Feil EJ, Holden MTG, Quail MA, Nickerson EK, et al.** Evolution of  
665 MRSA during hospital transmission and intercontinental spread. *Science* 2010;327:469–  
666 474.
- 667 62. **Carver T, Böhme U, Otto TD, Parkhill J, Berriman M.** BamView: Viewing  
668 mapped read alignment data in the context of the reference sequence. *Bioinformatics*  
669 2010;26:676–677.
- 670 63. **Rutherford K, Parkhill J, Crook J, Horsnell T, Rice P, et al.** Artemis: Sequence  
671 visualization and annotation. *Bioinformatics* 2000;16:944–945.
- 672 64. **Dorman MJ, Kane L, Domman D, Turnbull JD, Cormie C, et al.** The history,  
673 genome and biology of NCTC 30: a non-pandemic *Vibrio cholerae* isolate from World  
674 War One. *Proc R Soc B: Biol Sci* 2019;286:20182025.
- 675 65. **R Core Team.** *R: A language and environment for statistical computing.*  
676 <https://www.R-project.org/> (2018, accessed 20 June 2020).
- 677 66. **Wickham H.** *ggplot2: Elegant graphics for data analysis.* Springer-Verlag New  
678 York; 2016.
- 679 67. **Hadfield J, Croucher NJ, Goater RJ, Abudahab K, Aanensen DM, et al.**  
680 Phandango: An interactive viewer for bacterial population genomics. *Bioinformatics*  
681 2018;34:292–293.
- 682 68. **Reddi G, Pruss K, Cottingham KL, Taylor RK, Almagro-Moreno S.** Catabolism  
683 of mucus components influences motility of *Vibrio cholerae* in the presence of  
684 environmental reservoirs. *PLoS ONE* 2018;13:e0201383.
- 685 69. **Vaitkevicius K, Lindmark B, Ou G, Song T, Toma C, et al.** A *Vibrio cholerae*  
686 protease needed for killing of *Caenorhabditis elegans* has a role in protection from natural  
687 predator grazing. *Proc Natl Acad Sci USA* 2006;103:9280–9285.
- 688 70. **Sikora AE, Zielke RA, Lawrence DA, Andrews PC, Sandkvist M.** Proteomic  
689 analysis of the *Vibrio cholerae* type II secretome reveals new proteins, including three  
690 related serine proteases. *J Biol Chem* 2011;286:16555–16566.
- 691 71. **Farfán M, Miñana D, Fusté MC, Lorén JG.** Genetic relationships between clinical  
692 and environmental *Vibrio cholerae* isolates based on multilocus enzyme electrophoresis.  
693 *Microbiology*, 2000;146:2613–2626.
- 694 72. **Farfán M, Miñana-Galbis D, Fusté MC, Lorén JG.** Allelic diversity and  
695 population structure in *Vibrio cholerae* O139 Bengal based on nucleotide sequence  
696 analysis. *J Bacteriol* 2002;184:1304–1313.

- 697 73. **Keymer DP, Miller MC, Schoolnik GK, Boehm AB.** Genomic and phenotypic  
698 diversity of coastal *Vibrio cholerae* strains is linked to environmental factors. *Appl*  
699 *Environ Microbiol* 2007;73:3705–3714.
- 700 74. **Makino K, Oshima K, Kurokawa K, Yokoyama K, Uda T, et al.** Genome  
701 sequence of *Vibrio parahaemolyticus*: A pathogenic mechanism distinct from that of *V.*  
702 *cholerae*. *Lancet* 2003;361:743–749.
- 703 75. **Debnath A, Mizuno T, Miyoshi S.** Regulation of chitin-dependent growth and  
704 natural competence in *Vibrio parahaemolyticus*. *Microorganisms* 2020;8:1303.
- 705 76. **Svitil AL, Chadhain S, Moore JA, Kirchman DL.** Chitin degradation proteins  
706 produced by the marine bacterium *Vibrio harveyi* growing on different forms of chitin.  
707 *Appl Environ Microbiol* 1997;63:408–413.
- 708 77. **Wang Z, Hervey WJ, Kim S, Lin B, Vora GJ.** Complete genome sequence of the  
709 bioluminescent marine bacterium *Vibrio harveyi* ATCC 33843 (392 [MAV]). *Genome*  
710 *Announc* 2015;3. DOI: 10.1128/genomeA.01493-14.
- 711 78. **Suginta W, Sirimontree P, Sritho N, Ohnuma T, Fukamizo T.** The chitin-binding  
712 domain of a GH-18 chitinase from *Vibrio harveyi* is crucial for chitin-chitinase  
713 interactions. *Int J Biol Macromol* 2016;93:1111–1117.
- 714 79. **Songsiriritthigul C, Pantoom S, Aguda AH, Robinson RC, Suginta W.** Crystal  
715 structures of *Vibrio harveyi* chitinase A complexed with chitooligosaccharides:  
716 Implications for the catalytic mechanism. *J Struct Biol* 2008;162:491–499.
- 717 80. **Stauder M, Huq A, Pezzati E, Grim CJ, Ramoino P, et al.** Role of GbpA protein,  
718 an important virulence-related colonization factor, for *Vibrio cholerae*'s survival in the  
719 aquatic environment. *Environ Microbiol Rep* 2012;4:439–445.
- 720 81. **Vezzulli L, Stauder M, Grande C, Pezzati E, Verheye HM, et al.** *gbpA* as a novel  
721 qPCR target for the species-specific detection of *Vibrio cholerae* O1, O139, non-O1/non-  
722 O139 in environmental, stool, and historical continuous plankton recorder samples. *PLoS*  
723 *ONE* 2015;10. DOI: 10.1371/journal.pone.0123983.
- 724 82. **Nasreen T, Hussain NAS, Islam MT, Orata FD, Kirchberger PC, et al.**  
725 Simultaneous quantification of *Vibrio metoecus* and *Vibrio cholerae* with its O1 serogroup  
726 and toxigenic subpopulations in environmental reservoirs. *bioRxiv* 2019;822551.
- 727 83. **Chowdhury F, Mather AE, Begum YA, Asaduzzaman M, Baby N, et al.** *Vibrio*  
728 *cholerae* serogroup O139: Isolation from cholera patients and asymptomatic household  
729 family members in Bangladesh between 2013 and 2014. *PLOS Negl Trop Dis*  
730 2015;9:e0004183.
- 731 84. **Gardner AD, Venkatraman KV.** The antigens of the cholera group of Vibrios. *J*  
732 *Hyg (Lond)* 1935;35:262–282.
- 733 85. **Hasan NA, Choi SY, Eppinger M, Clark PW, Chen A, et al.** Genomic diversity of  
734 2010 Haitian cholera outbreak strains. *Proc Natl Acad Sci USA* 2012;109:E2010–E2017.

- 735 86. **Guzman LM, Belin D, Carson MJ, Beckwith J.** Tight regulation, modulation, and  
736 high-level expression by vectors containing the arabinose P<sub>BAD</sub> promoter. *J Bacteriol*  
737 1995;177:4121–4130.
- 738 87. **Dorman MJ, Kane L, Domman D, Turnbull JD, Cormie C, et al.** Table S1 from  
739 The history, genome and biology of NCTC 30: a non-pandemic *Vibrio cholerae* isolate  
740 from World War One. *Figshare (The Royal Society)*;Dataset. 2019. DOI:  
741 10.6084/m9.figshare.7906997.v2.
- 742
- 743

744 **Tables**

745

746 **Table 1. Strains, plasmids, and oligonucleotides used in this study.** Restriction enzyme

747 recognition sites are underlined. The primer sequence incorporating a C-terminal 6xHis

748 translational fusion into *chiA-3* is presented in lowercase, and the sequences of ribosome

749 binding sites, start, and STOP codons are in **bold**. CmR = Chloramphenicol resistant. StrR =

750 streptomycin resistant.

751

| <b>Internal strain ID</b> | <b>Strain name</b>           | <b>Genotype/Details</b>                                                                                                                                                                             | <b>Source/Reference</b>                                                           |
|---------------------------|------------------------------|-----------------------------------------------------------------------------------------------------------------------------------------------------------------------------------------------------|-----------------------------------------------------------------------------------|
| <i>Vibrio cholerae</i>    |                              |                                                                                                                                                                                                     |                                                                                   |
| MJD382                    | NCTC 30                      | Non-pandemic <i>V. cholerae</i> harbouring <i>chiA-3</i>                                                                                                                                            | Thomson lab stocks; National Centre for Type Cultures, batch 3, sequenced in [64] |
| <i>Escherichia coli</i>   |                              |                                                                                                                                                                                                     |                                                                                   |
| MJD1506                   | NEB <sup>®</sup> 10-beta     | $\Delta(ara-leu)$ 7697 <i>araD139 fhuA</i> $\Delta lacX74$ <i>galK16 galE15</i> <i>e14-□80dlacZΔM15</i> <i>recA1 relA1 endA1 nupG rpsL</i> (Str <sup>R</sup> ) <i>rph spoT1 Δ(mrr-hsdRMS-mcrBC)</i> | New England Biolabs                                                               |
| MJD1507                   | NEB <sup>®</sup> NiCo21(DE3) | <i>can::CBD fhuA2 [lon] ompT gal</i> ( $\lambda$ <i>DE3</i> ) [ <i>dcm</i> ] <i>arnA::CBD slyD::CBD</i>                                                                                             | New England Biolabs                                                               |



|                     |                                |                                                                                           |                          |
|---------------------|--------------------------------|-------------------------------------------------------------------------------------------|--------------------------|
|                     |                                | <i>glmS6Ala ΔhsdS λ DE3 = λ sBamHlo ΔEcoRI-B int::(lacI::PlacUV5::T7 gene1) i21 Δnin5</i> |                          |
| MJD1481             | MJD1481                        | 10-beta harbouring pMJD157. CmR                                                           | This study               |
| MJD1495             | MJD1495                        | 10-beta harbouring pBAD33. CmR                                                            | This study               |
| MJD1496             | MJD1496                        | NiCo21(DE3) harbouring pMJD157. CmR                                                       | This study               |
| MJD1499             | MJD1499                        | NiCo21(DE3) harbouring pBAD33. CmR                                                        | This study               |
|                     |                                |                                                                                           |                          |
| <b>Plasmid name</b> |                                | <b>Genotype/Details</b>                                                                   | <b>Source/Reference</b>  |
| pBAD33              |                                | Arabinose-inducible expression plasmid; pACYC184 replication origin. CmR                  | Thomson lab stocks; [86] |
| pMJD157             |                                | <i>chiA-3</i> cloned into pBAD33. CmR                                                     | This study               |
|                     |                                |                                                                                           |                          |
| <b>Primer ID</b>    | <b>Other name</b>              | <b>Sequence 5'-3'</b>                                                                     |                          |
| oMJD202             | TF_SacI_Chitinase_F            | GCGAGCTCAGGAGGATCTCTATGAAAAAA<br>ACAGTCATTGCTACC                                          |                          |
| oMJD203             | TF_Chitinase_6xHis_STOP_SalI_R | GCGTCGACTTAgtgatggtgatggtgatg<br>TTTGATCGTTTCAAACATGGT                                    |                          |
| oMJD204             | pBAD33_check_F                 | GCCATAGCATTTTTATCCATA                                                                     |                          |
| oMJD205             | pBAD33_check_R                 | GCCAGGCAAATTCTGTTTTAT                                                                     |                          |

752

753

754 **Table 2. Pairwise BLASTp alignments between *chiA-3* and chitinases from Hunt *et al***  
 755 **[19].** No significant alignment was found between *chiA-3* and *VAS14\_08875*, *VAS14\_08910*,  
 756 *VI2G01\_01435*, *VI2G01\_22308*, or *VF1146*. A multiple sequence alignment containing each  
 757 of these protein sequences has been included in the Figshare repository for this study.  
 758

| Chitinase gene       | Species                                   | Accession # | Subject length (aa) | e-value | Covered by query (%) | Identity (%) |
|----------------------|-------------------------------------------|-------------|---------------------|---------|----------------------|--------------|
| <i>chiA-3</i> (self) | <i>Vibrio cholerae</i>                    | n/a         | 431                 | 0       | 100                  | 100          |
| <i>SKA34_14935</i>   | <i>Photobacterium</i><br><i>sp.</i>       | EAR55415.1  | 441                 | 5e-116  | 99                   | 39.63        |
| <i>SKA34_13330</i>   | <i>Photobacterium</i><br><i>sp.</i>       | EAR55445.1  | 399                 | 6e-08   | 21                   | 28.97        |
| <i>P3TCK_21620</i>   | <i>Photobacterium</i><br><i>profundum</i> | EAS45126.1  | 948                 | 2e-04   | 30                   | 27.47        |
| <i>VAS14_08875</i>   | <i>Vibrio angustum</i>                    | EAS63573.1  | 560                 | n/a     | n/a                  | n/a          |
| <i>VAS14_08910</i>   | <i>Vibrio angustum</i>                    | EAS63580.1  | 732                 | n/a     | n/a                  | n/a          |
| <i>VI2G01_01435</i>  | <i>Vibrio</i><br><i>alginolyticus</i>     | EAS76629.1  | 718                 | n/a     | n/a                  | n/a          |
| <i>VI2G01_22308</i>  | <i>Vibrio</i><br><i>alginolyticus</i>     | EAS77796.1  | 307                 | n/a     | n/a                  | n/a          |
| <i>VF1146</i>        | <i>Aliivibrio fischeri</i>                | AAW85641.1  | 789                 | n/a     | n/a                  | n/a          |
| <i>VPA1177</i>       | <i>Vibrio</i><br><i>parahaemolyticus</i>  | BAC62520.1  | 430                 | 0       | 100                  | 76.57        |

759

760

761 **Figures**

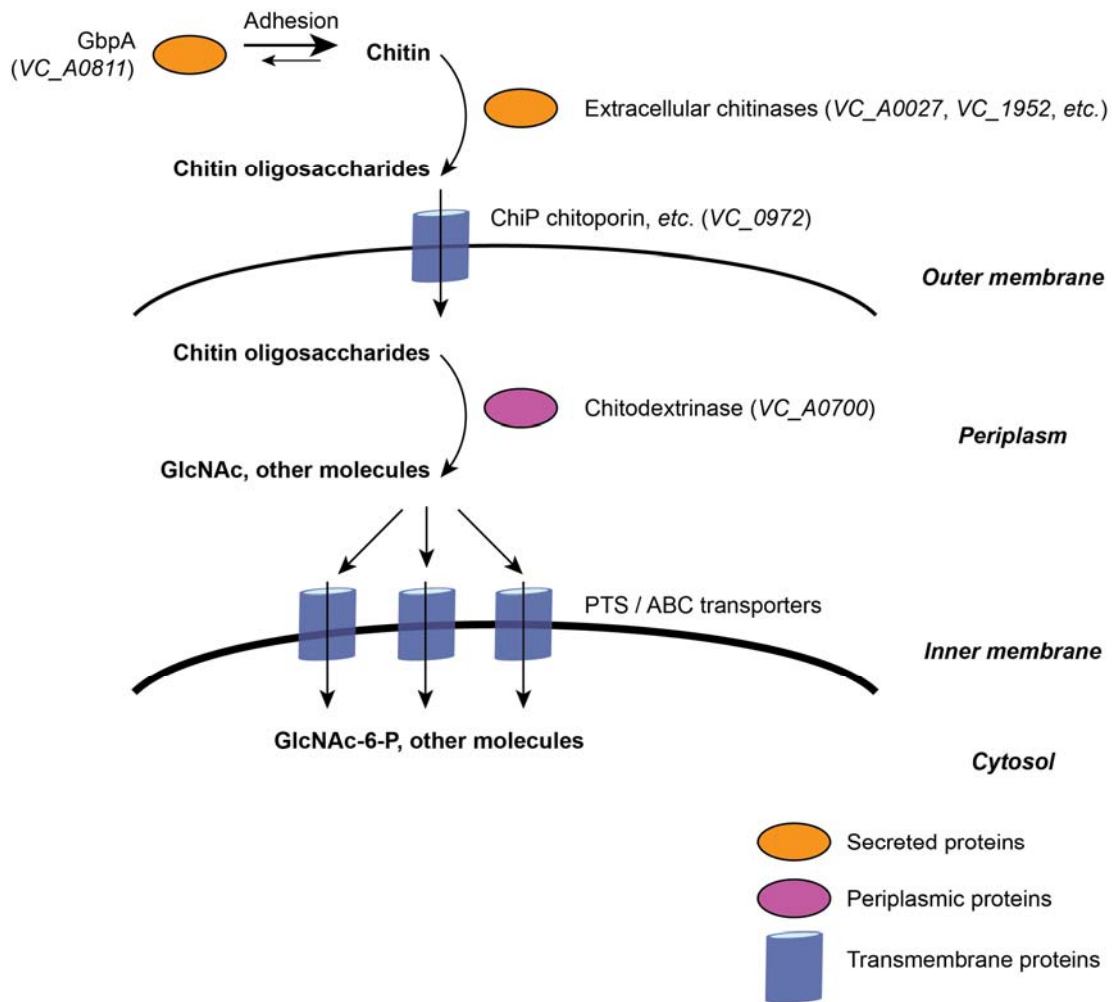

762

763 **Figure 1. Initial steps in *V. cholerae* chitin uptake and catabolism.** Schematic  
764 summarising the principal stages in chitin degradation and import by *V. cholerae*.  
765 Comprehensive descriptions of this pathway are reported in [19, 35]. The MSHA adhesin has  
766 not been included in this diagram.

767

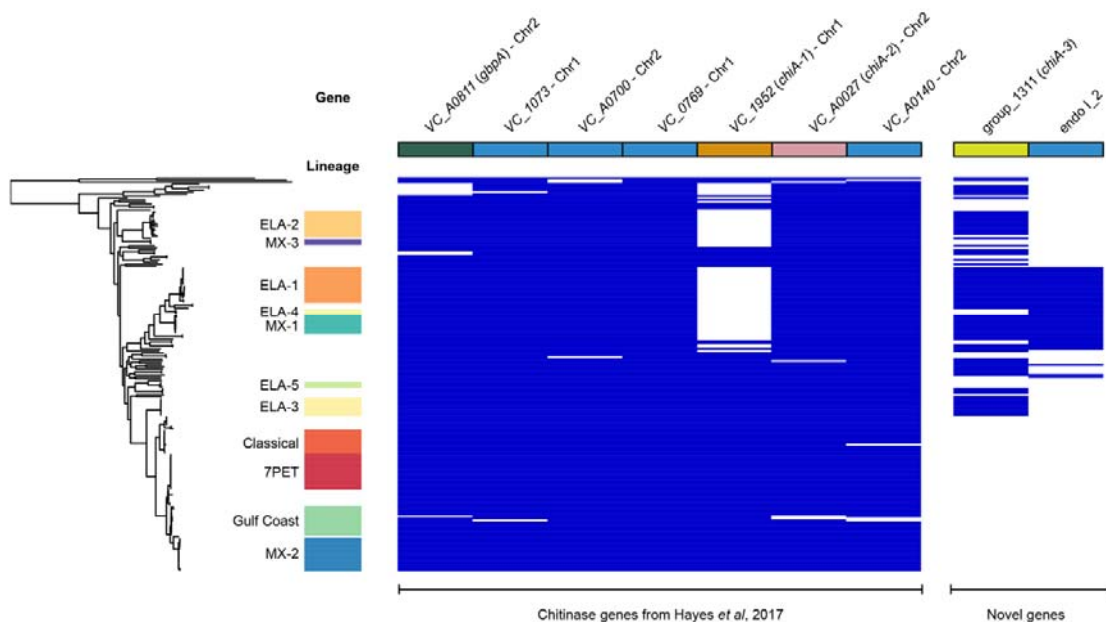

768

769 **Figure 2. Distribution of chitinase genes amongst diverse *V. cholerae*.** Visualisation of the  
770 presence and absence of genes encoding key *V. cholerae* chitinase enzymes and chitin  
771 adhesion factors (Figure 1). The seven genes encoding putative *V. cholerae* endochitinases  
772 described by [44] are listed, as well as two additional putative chitinases identified in this  
773 analysis. Figure generated using Phandango [67]. Isolate assignments to *V. cholerae* lineages  
774 were taken verbatim from [64, 87], and are named after [8]. Chromosomal location assigned  
775 to genes present in N16961. Colour coding of *chiA-1*, *chiA-2*, and *chiA-3* is consistent among  
776 figures in the manuscript.

777

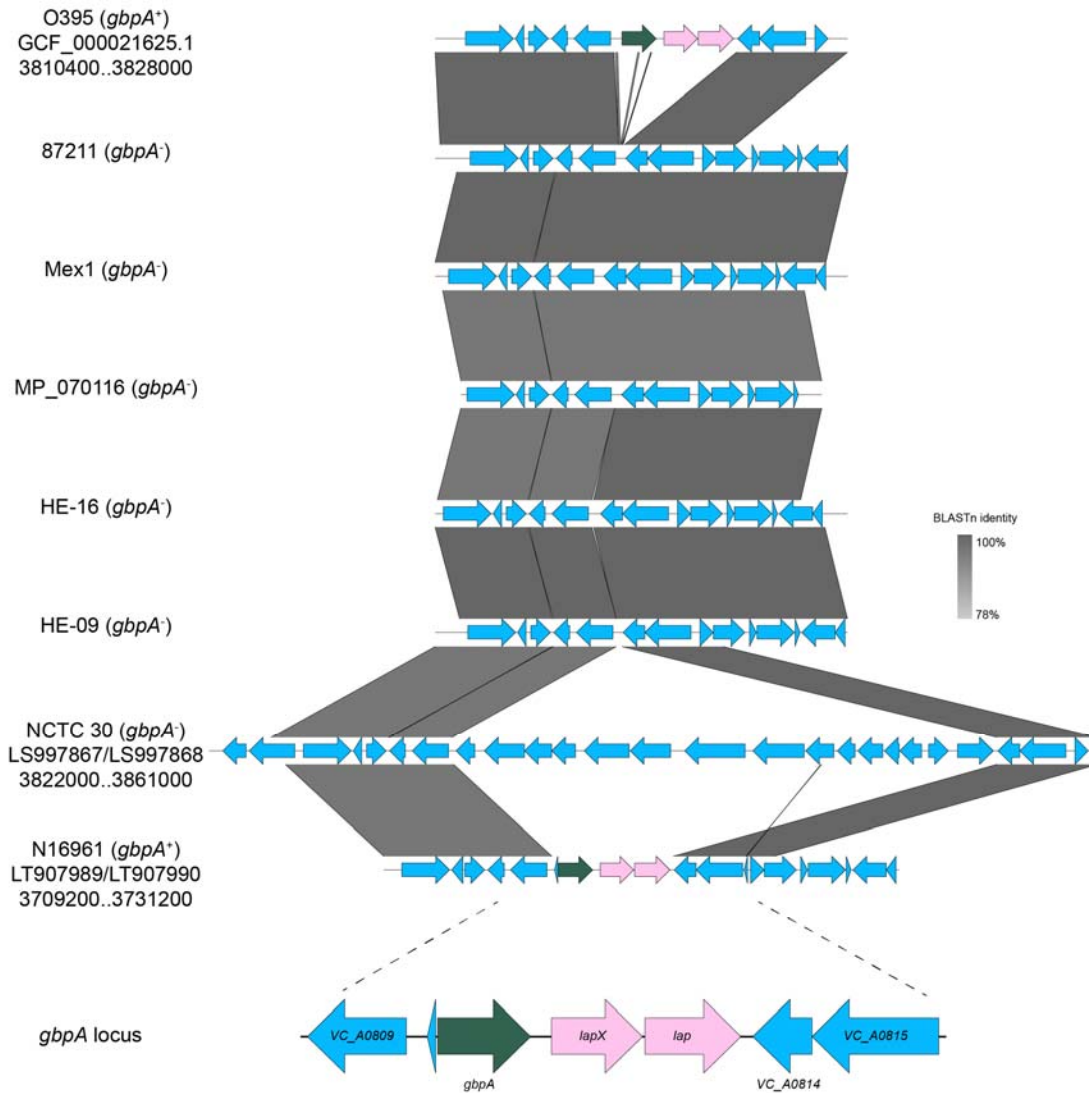

778

779 **Figure 3. Confirming the absence of *gbpA* and adjacent genes from assemblies.**

780 Heterogeneity at the genomic locus encompassing *VC\_A0811* was observed in isolates

781 lacking *gbpA*. All assemblies lacked *VC\_A0811-VC\_A0813*, and these genes were replaced

782 with sequence containing at least 15 genes in NCTC 30. Read mapping data confirming the

783 absence of *VC\_A0811-VC\_A0813* from NCTC 30 are presented in Supplementary Figure 1.

784 Accession numbers and assembly co-ordinates are reported for reference and closed genome

785 sequences. Figure generated using Easyfig [60] and BLASTn comparisons [57]. *VC\_A0811-*

786 *VC\_A0813* are highlighted in N16961 and O395 (both *gbpA*<sup>+</sup>) for ease of illustration.

787

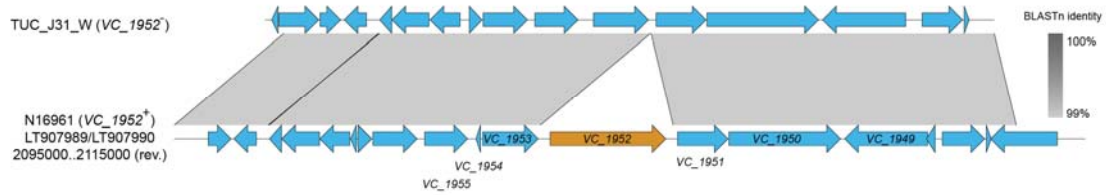

788

789 **Figure 4. Genes adjacent to the *VC\_1952* locus are intact in genomes lacking *chiA-1*.** An

790 example is presented in which the genes flanking *VC\_1952* remain intact in the absence of

791 *VC\_1952* itself, contrasting with the observation made at the *gfpA* locus (Figure 3). A larger

792 number of diverse genomes are similarly analysed in Supplementary Figure 3. Figure

793 generated using Easyfig [60] and BLASTn comparisons [57].

794

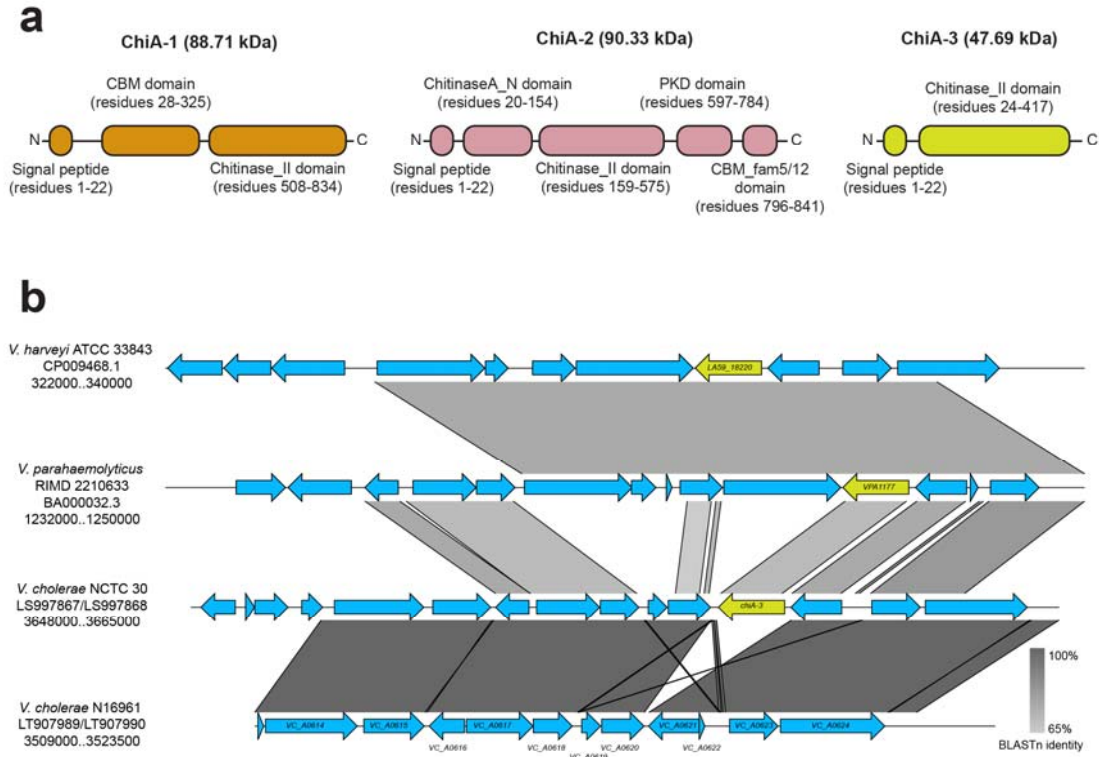

795

796 **Figure 5. ChiA-3 is a protein distinct from ChiA-1 and ChiA-2.** (a): Cartoons of the  
 797 protein domains predicted to be present in each of ChiA-1, ChiA-2, and ChiA-3 are  
 798 presented. Predicted molecular weights are indicated. Proteins are not to scale. (b): *chiA-3* is  
 799 integrated between *VC\_A0620* and *VC\_A0621* in the smaller *V. cholerae* chromosome. This  
 800 genomic position is conserved in *Vibrio* spp. which harbour *chiA-3* orthologues [74, 77].  
 801 Figure generated using Easyfig [60] and BLASTn comparisons [57].

802

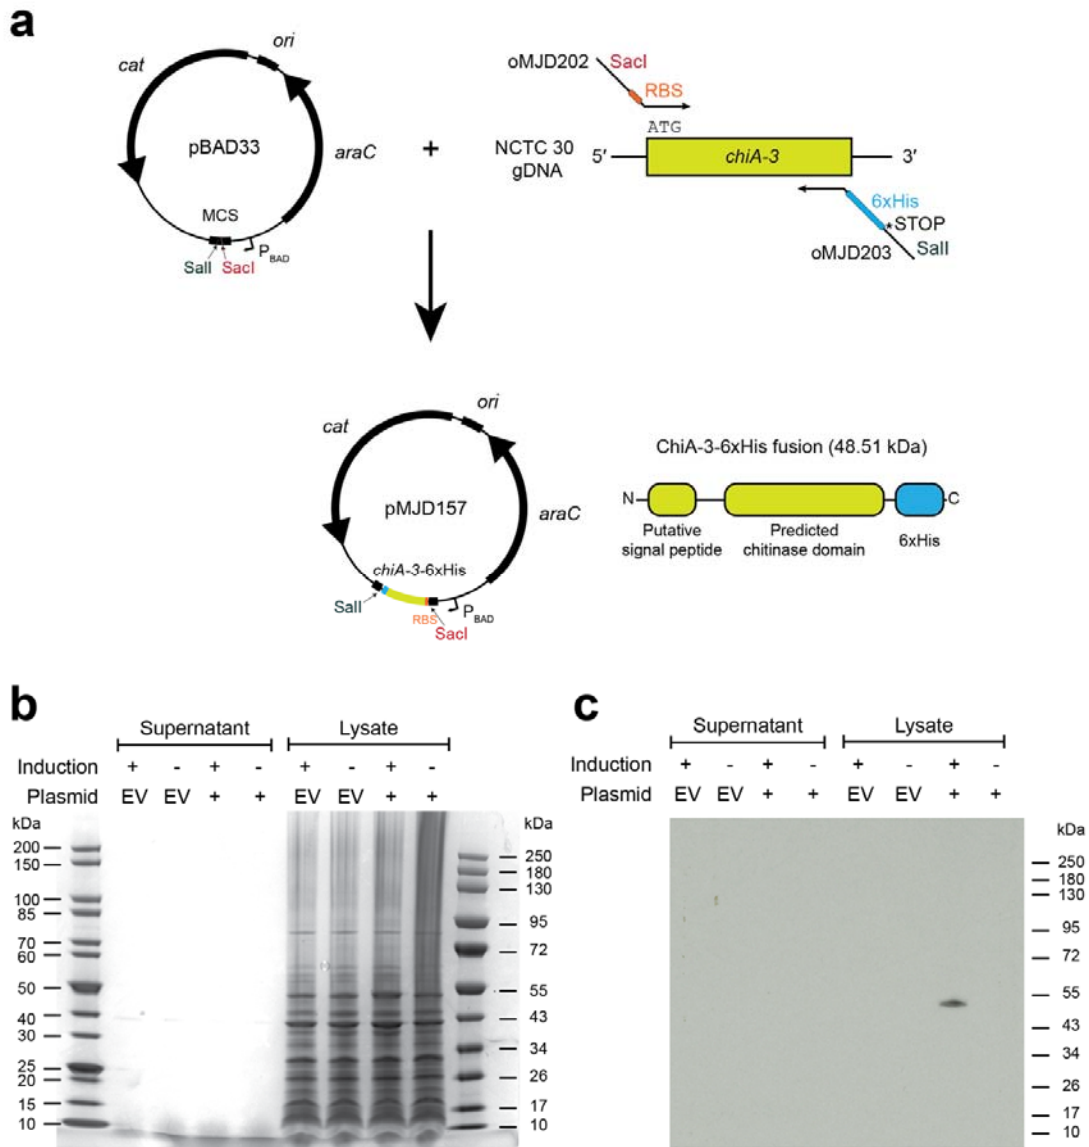

803

804 **Figure 6. Molecular cloning of *chiA-3* and expression of ChiA-3-6xHis.** (a): Schematic of  
 805 cloning strategy used to amplify and insert *chiA-3* directionally into the pBAD33 multiple  
 806 cloning site (MCS), under the arabinose-inducible P<sub>BAD</sub> promoter, and to incorporate a C-  
 807 terminal 6xHis tag as a translational fusion. A linker sequence was not incorporated between  
 808 the C-terminus of ChiA-3 and the 6xHis tag. Figures are not to scale. (b): InstantBlue-stained  
 809 acrylamide gel of proteins present in supernatants and cell pellet lysates from cultures grown  
 810 at 23 °C supplemented with arabinose (induction +) or glucose (induction -). No induced  
 811 bands were easily discerned. (c): Western immunoblot produced from an identically-loaded



812 acrylamide gel to that presented in (b), run in parallel with the gel in (b), and probed with an  
813  $\alpha$ -6xHis antibody (see Methods). A band corresponding to the expected molecular weight of  
814 ChiA-3-6xHis (48.51 kDa) was detected in the cell pellet lysate of *E. coli* harbouring  
815 pMJD157 only (plasmid +). This size is consistent with the retention of the fusion protein  
816 without the cleavage of the putative signal sequence. Protein ladders: NEB #P7719S and  
817 #P7717S. EV = empty vector (pBAD33).

818

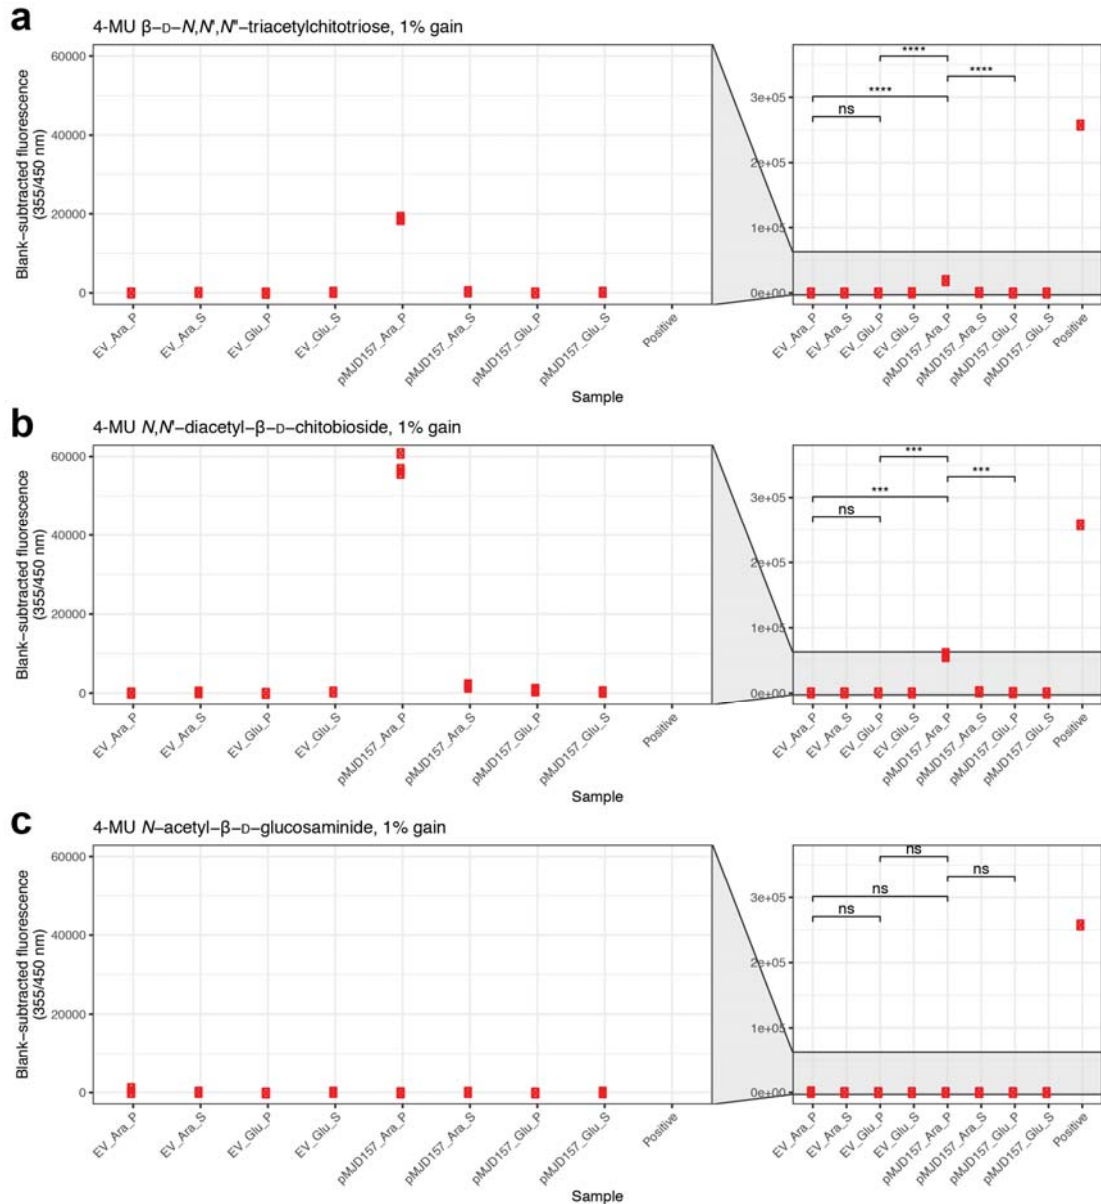

819

820 **Figure 7. ChiA-3-6xHis displays chitobiosidase and endochitinase activities, but not  $\beta$ -**

821 **N-acetylglucosaminidase activity.** Lysates and supernatants included in Figures 6b and 6c

822 were assayed for chitinase enzyme activity using a fluorometric chitinase assay kit (see

823 Methods for details). Lysed cells from *E. coli* cultures harbouring pMJD157 and cultured in

824 the presence of arabinose were the only samples which produced detectable and statistically

825 significant signals on triacetylchitotriose and chitobiose substrates (a, b). No signal was

826 detected in the presence of glucosaminide substrate (c). All plots are scaled equivalently. P =

827 pellet; S = supernatant; EV = empty vector (pBAD33). Parametric t-tests performed where

828 indicated: ns = not significant; \*\*\* =  $p < 0.001$ ; \*\*\*\* =  $p < 0.0001$ .

829

830

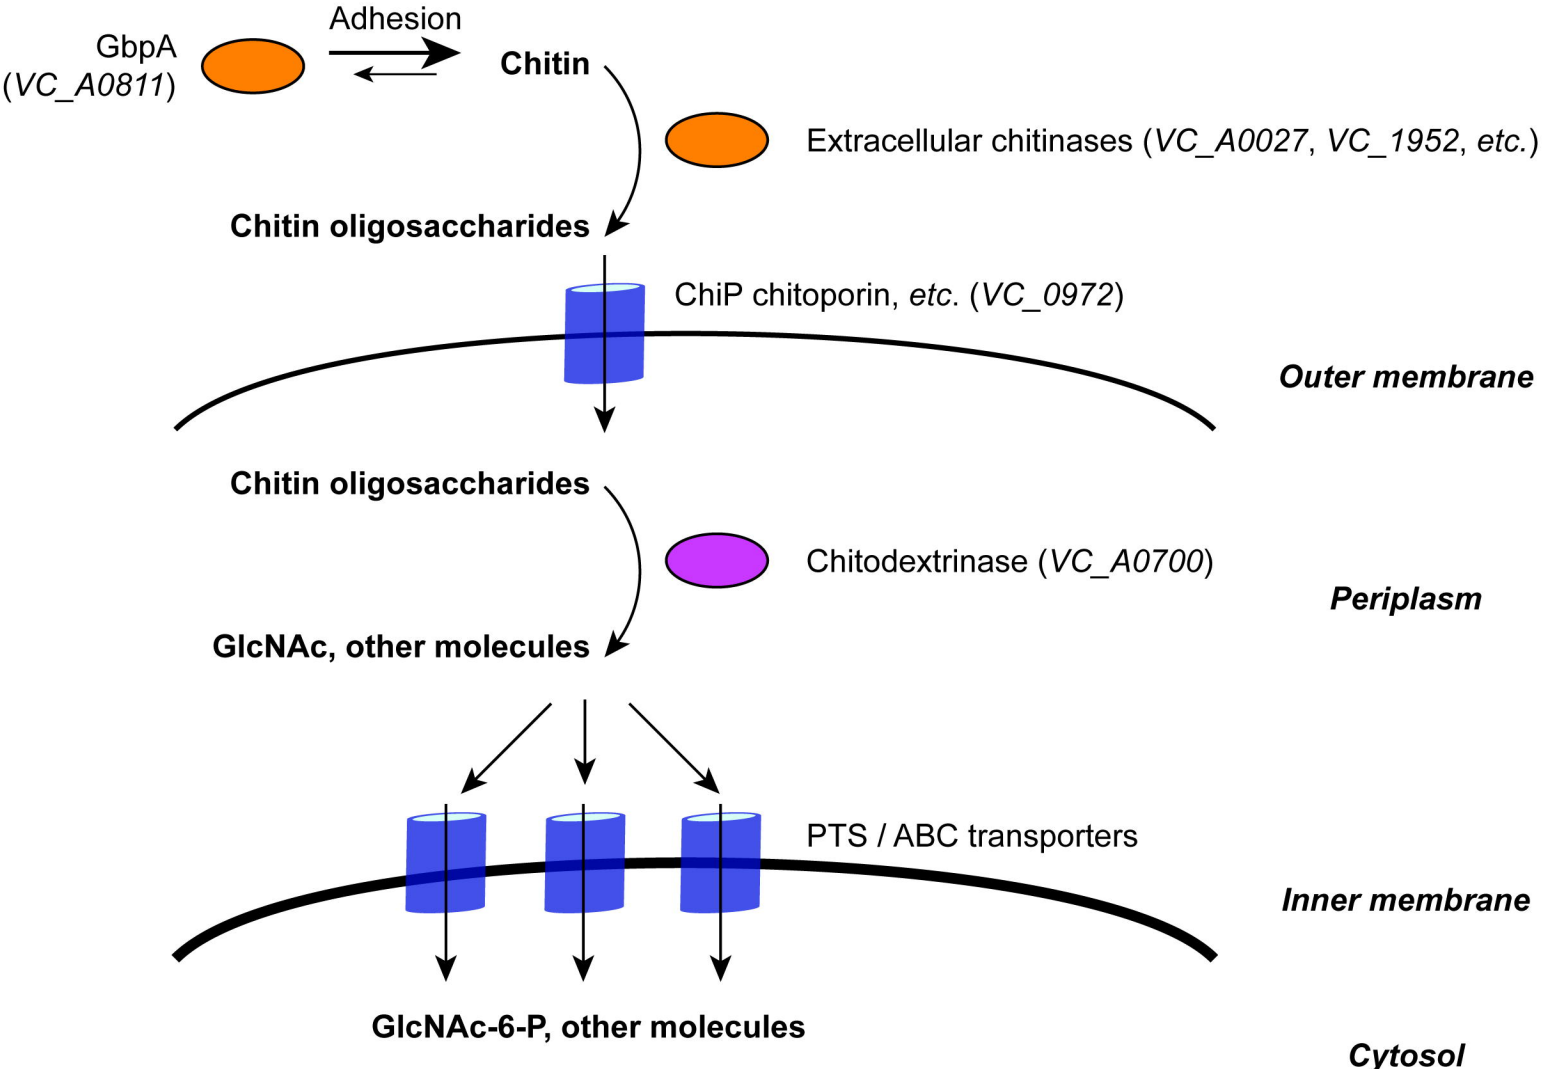

-  Secreted proteins
-  Periplasmic proteins
-  Transmembrane proteins

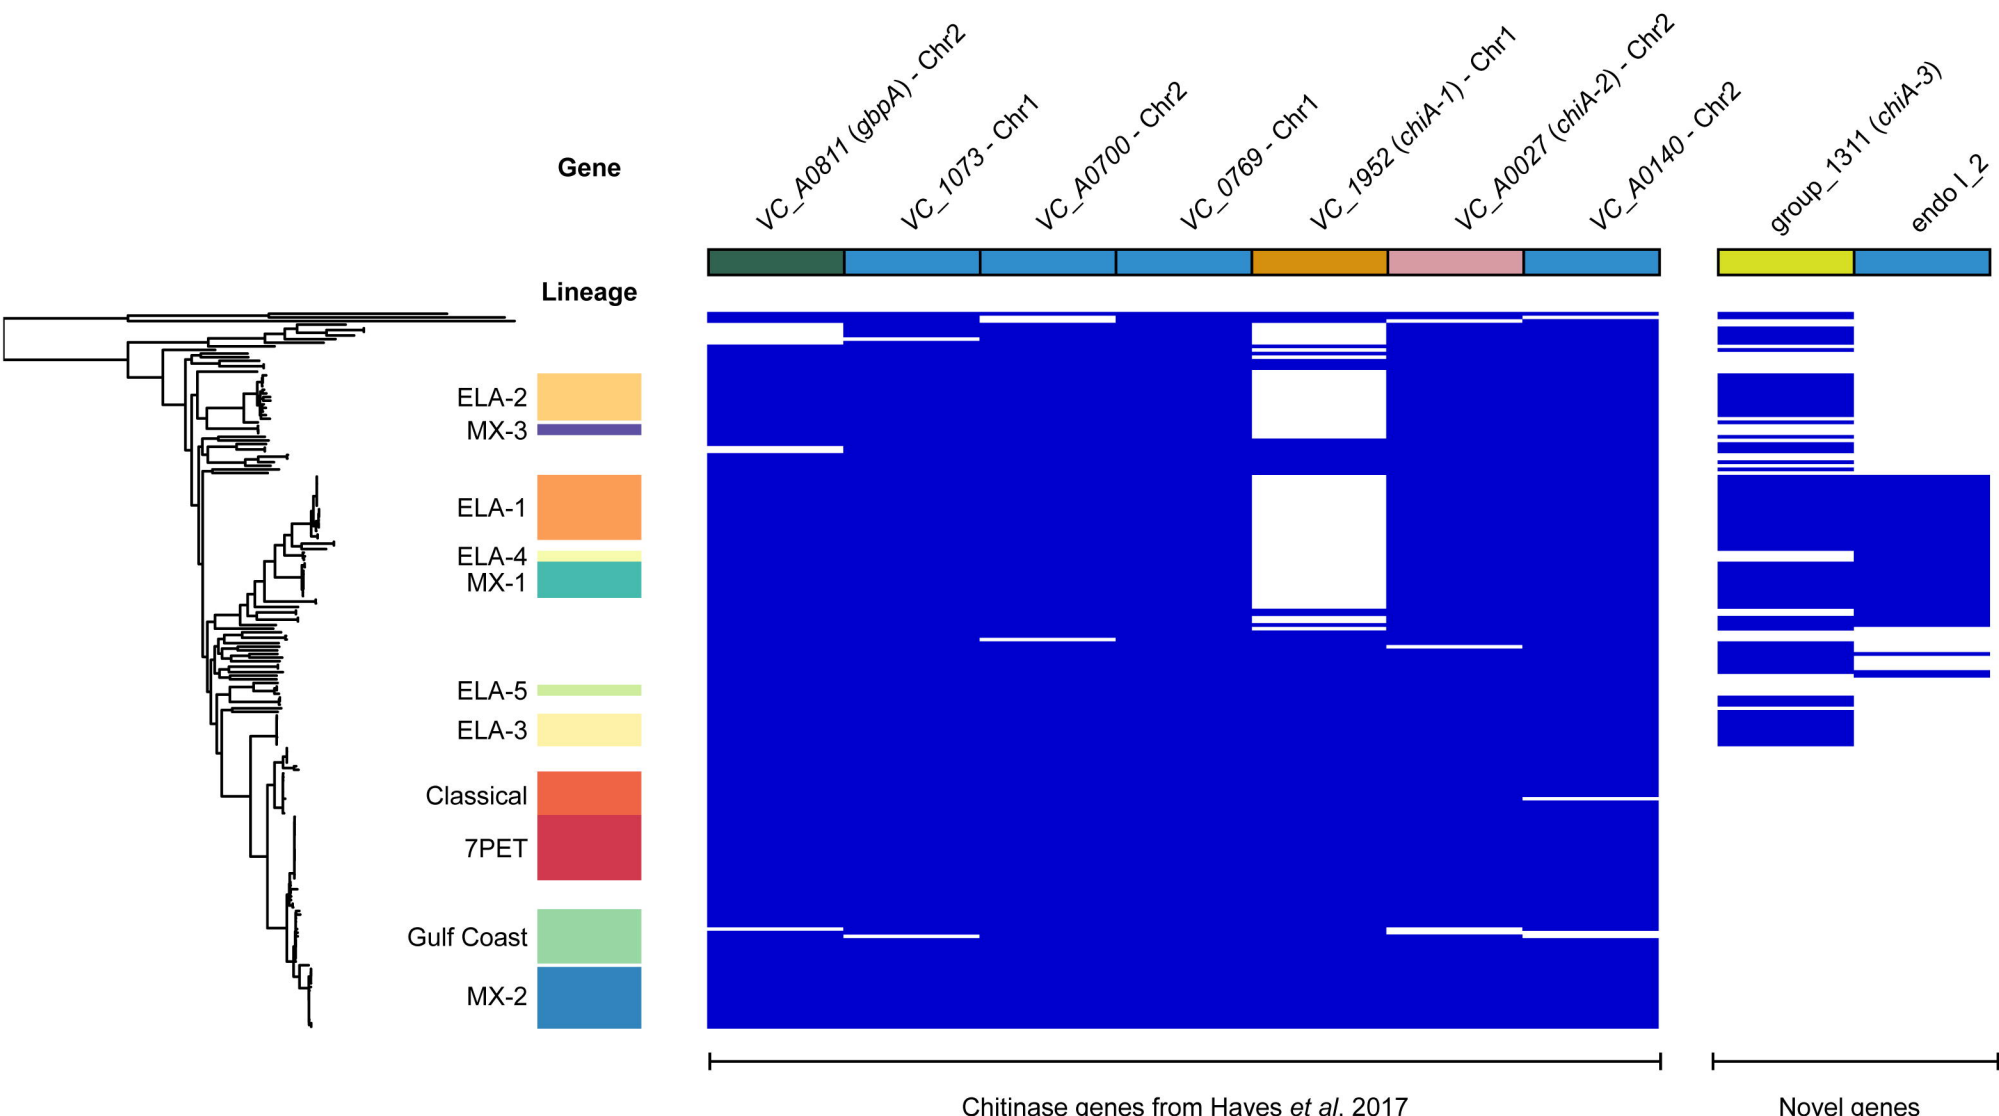

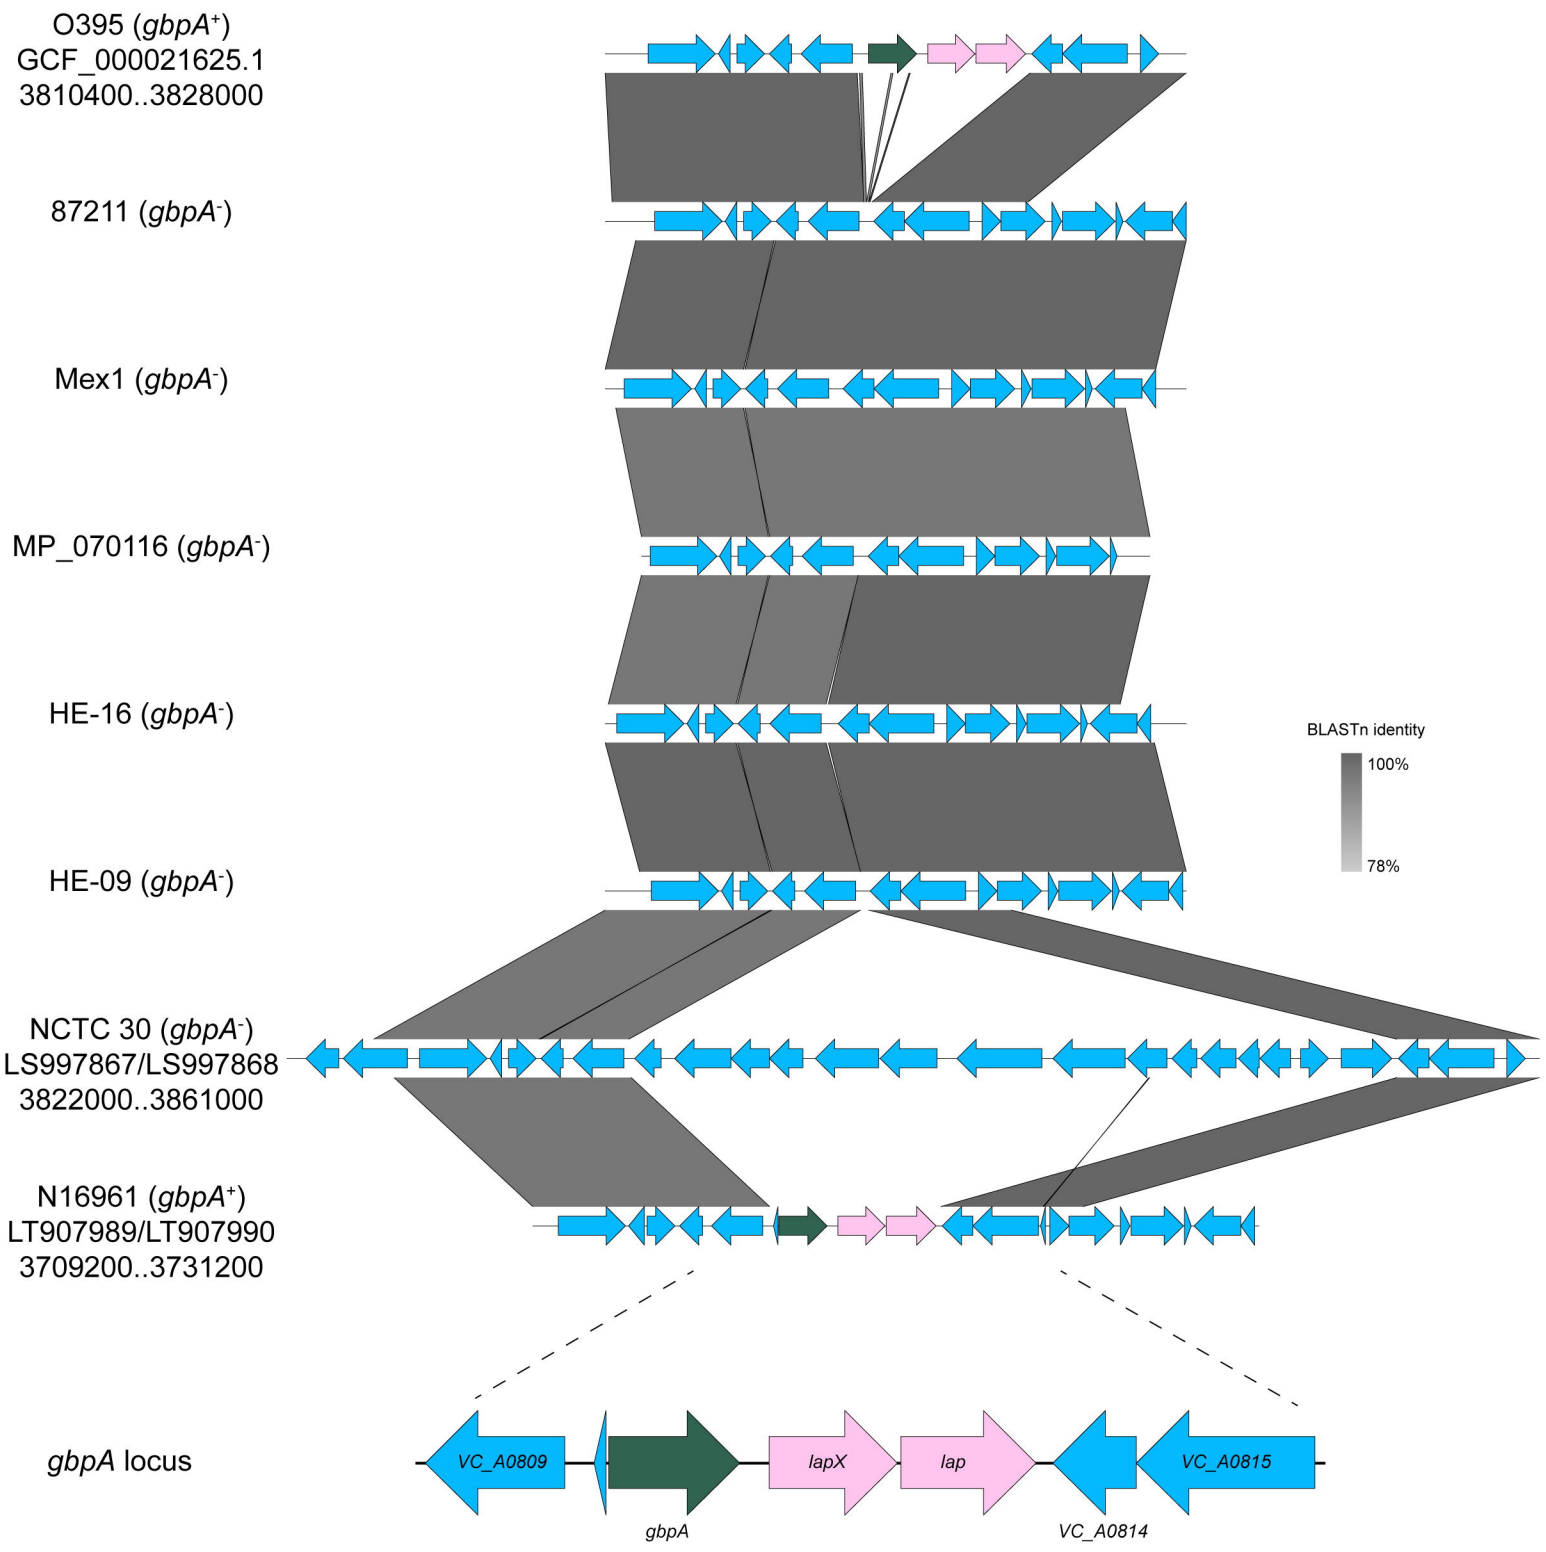

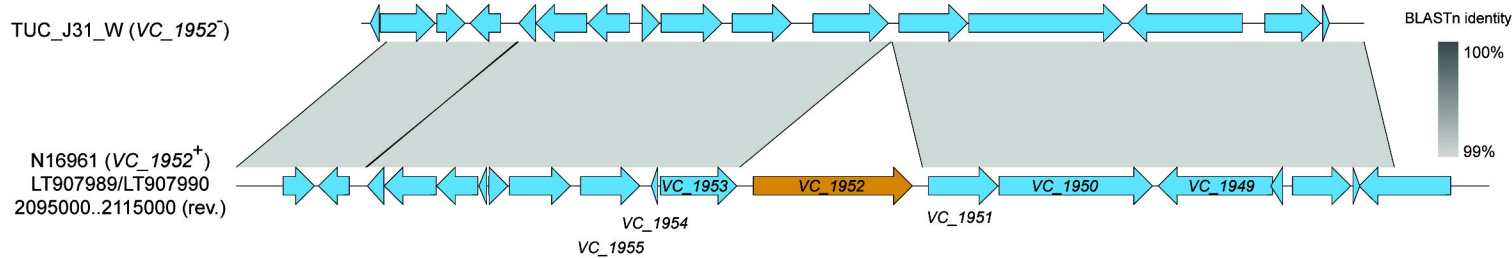

**a****ChiA-1 (88.71 kDa)**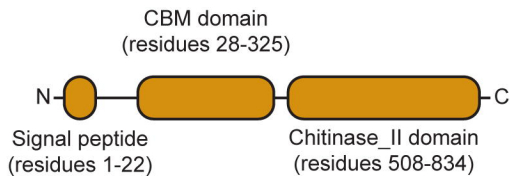**ChiA-2 (90.33 kDa)**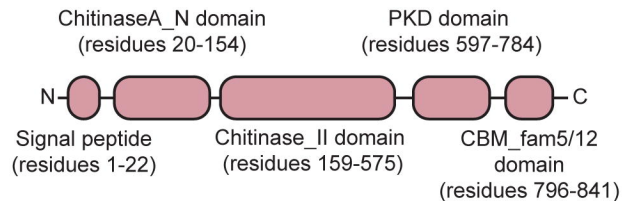**ChiA-3 (47.69 kDa)**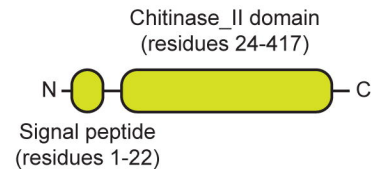**b**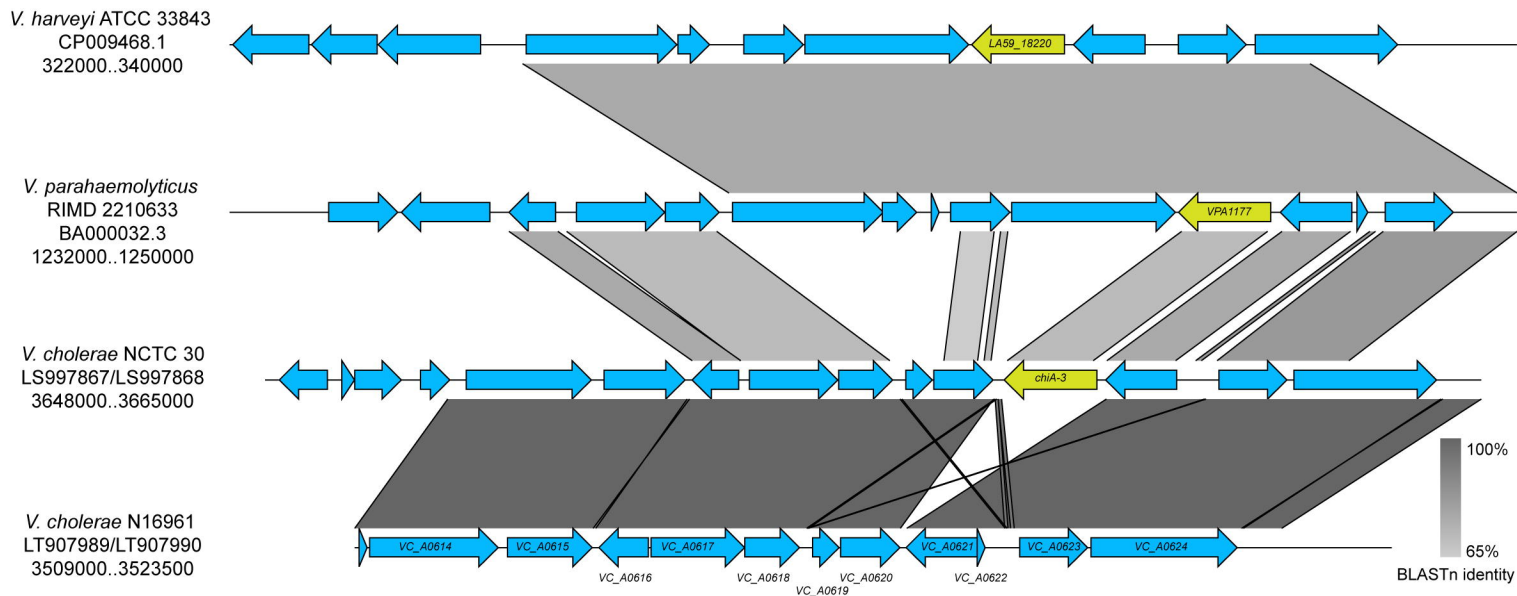



**a**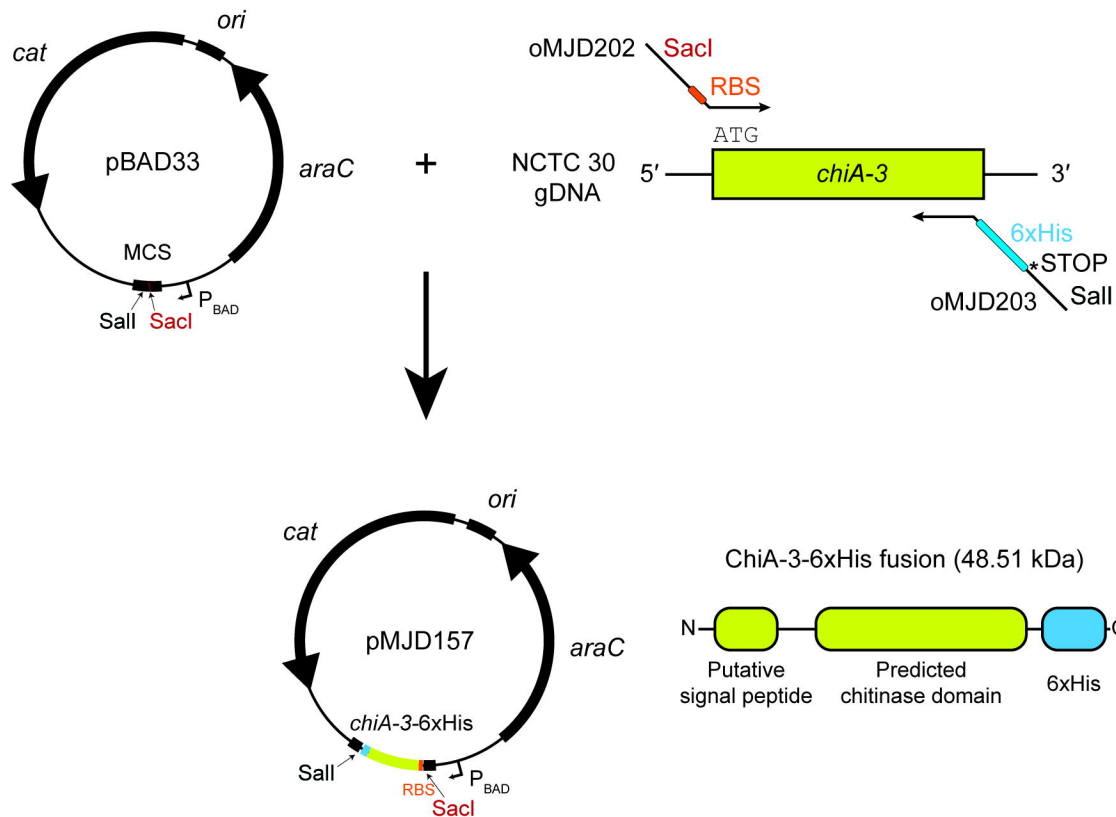**b**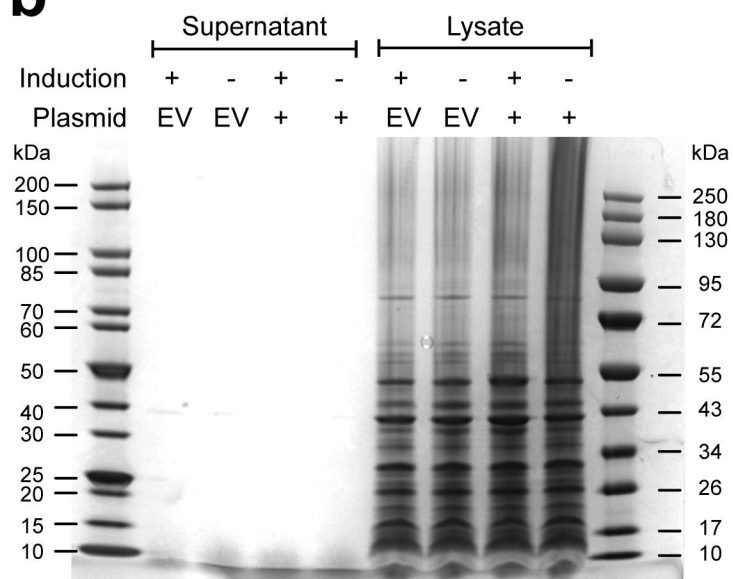**c**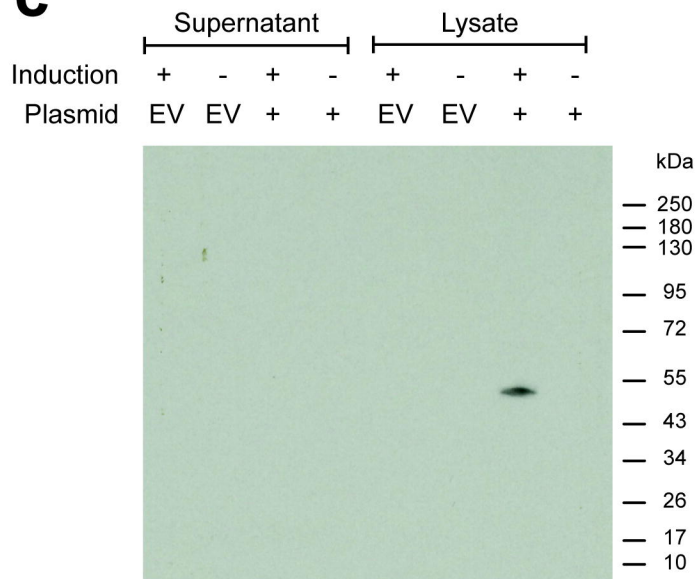

**a**4-MU  $\beta$ -D-N,N',N''-triacetylchitotriose, 1% gain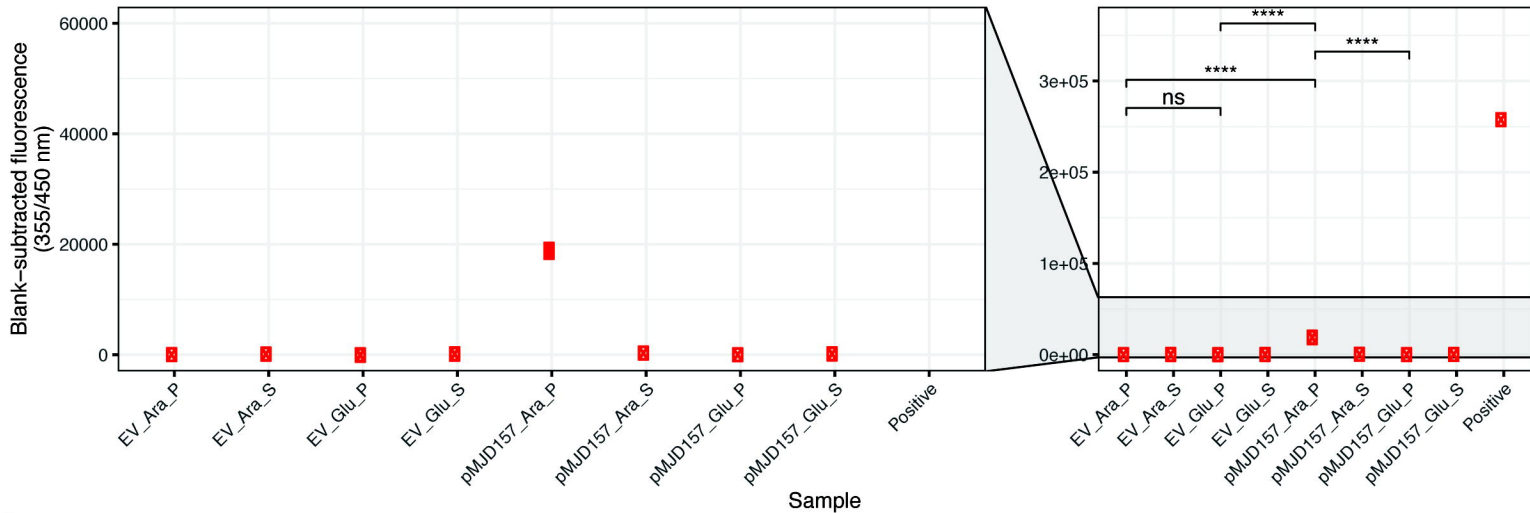**b**4-MU N,N'-diacetyl- $\beta$ -D-chitobioside, 1% gain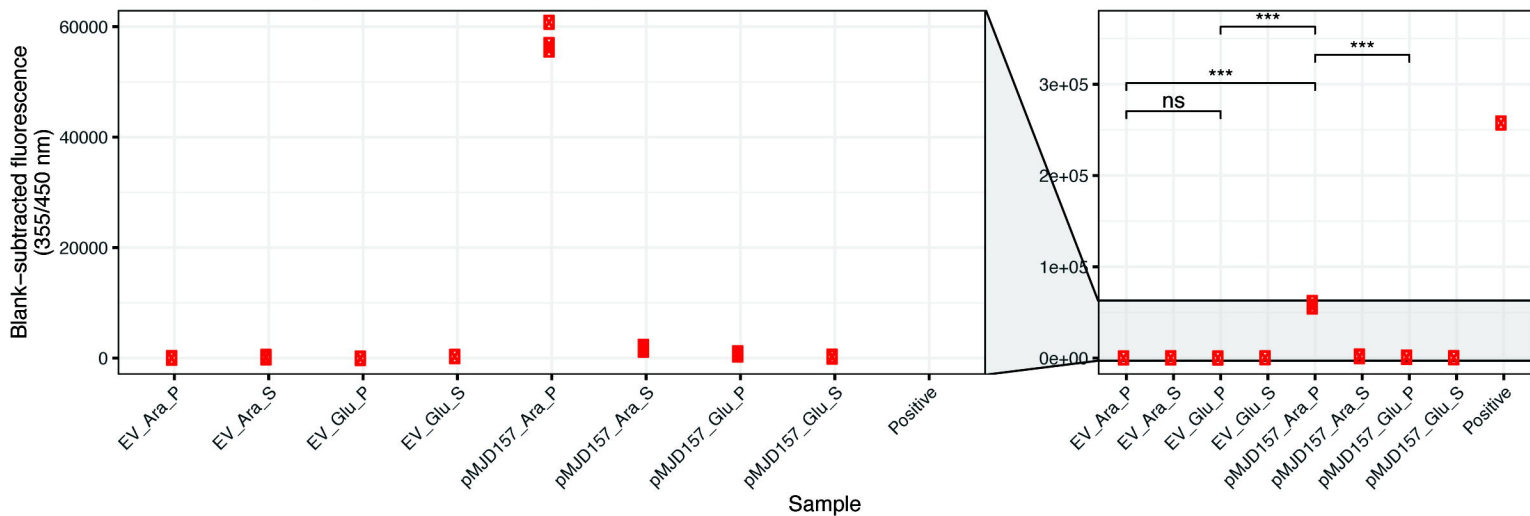**c**4-MU N-acetyl- $\beta$ -D-glucosaminide, 1% gain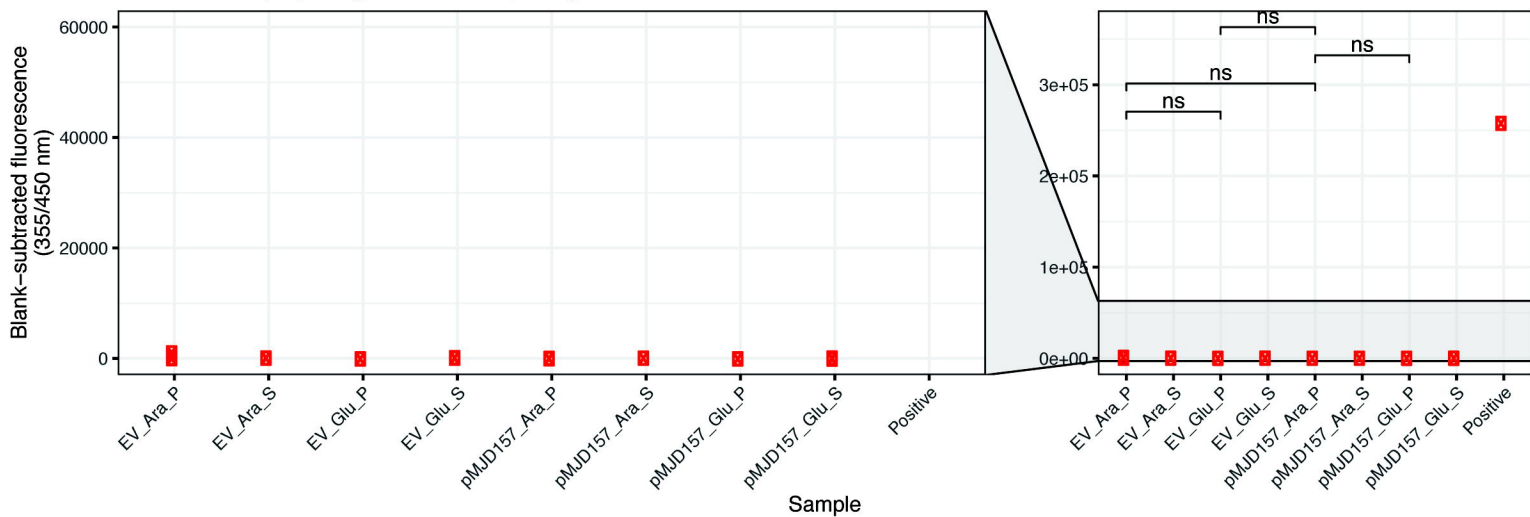

Source: https://biorxiv.org/content/10.1101/2021.02.11.430729v1.full.pdf
